# Supplementary material for: Rehabilitation during intensive treatment of acute leukaemia including allogenic stem cell transplantation: a qualitative study of patient experiences
Source: PubMed Central journal article supplement — BMJ Open. 2019 Nov 14;9(11):e029470. doi: 10.1136/bmjopen-2019-029470 (PMC6886906; doi:10.1136/bmjopen-2019-029470), 2019-11-14
Supplement: bmjopen-2019-029470.draft_revisions.pdf [file bmjopen-2019-029470.draft_revisions.pdf]

# BMJ Open

BMJ Open is committed to open peer review. As part of this commitment we make the peer review history of every article we publish publicly available.

When an article is published we post the peer reviewers' comments and the authors' responses online. We also post the versions of the paper that were used during peer review. These are the versions that the peer review comments apply to.

The versions of the paper that follow are the versions that were submitted during the peer review process. They are not the versions of record or the final published versions. They should not be cited or distributed as the published version of this manuscript.

BMJ Open is an open access journal and the full, final, typeset and author-corrected version of record of the manuscript is available on our site with no access controls, subscription charges or pay-per-view fees (<http://bmjopen.bmj.com>).

If you have any questions on BMJ Open's open peer review process please email [info.bmjopen@bmj.com](mailto:info.bmjopen@bmj.com)

# BMJ Open

## Rehabilitation during intensive treatment of acute leukemia including allogeneic stem cell transplantation – a qualitative study of patient experiences

|                               |                                                                                                                                                                                                                                                                                                                                                                                                                                                                                          |
|-------------------------------|------------------------------------------------------------------------------------------------------------------------------------------------------------------------------------------------------------------------------------------------------------------------------------------------------------------------------------------------------------------------------------------------------------------------------------------------------------------------------------------|
| Journal:                      | <i>BMJ Open</i>                                                                                                                                                                                                                                                                                                                                                                                                                                                                          |
| Manuscript ID                 | bmjopen-2019-029470                                                                                                                                                                                                                                                                                                                                                                                                                                                                      |
| Article Type:                 | Research                                                                                                                                                                                                                                                                                                                                                                                                                                                                                 |
| Date Submitted by the Author: | 28-Jan-2019                                                                                                                                                                                                                                                                                                                                                                                                                                                                              |
| Complete List of Authors:     | Jepsen, Lene Østergaard; Odense Universitetshospital, Friis, Lone Smidstrup; Rigshospitalet, Hematology<br>Hoybye, Mette Terp; Regionshospitalet Silkeborg, 3. Interdisciplinary Research Unit, Elective Surgery Center<br>Marcher, Claus Werenberg; Odense Universitetshospital, Hematology<br>Hansen, Dorte; University of Southern Denmark, National Research Centre for Cancer Rehabilitation, National Research Centre for Cancer Rehabilitation, Research Unit of General Practice |
| Keywords:                     | Leukaemia < HAEMATOLOGY, REHABILITATION MEDICINE, Everyday life, QUALITATIVE RESEARCH                                                                                                                                                                                                                                                                                                                                                                                                    |
|                               |                                                                                                                                                                                                                                                                                                                                                                                                                                                                                          |

SCHOLARONE™  
Manuscripts

## Manuscript 3

1  
2  
3  
4 Rehabilitation during intensive treatment of acute leukemia including allogenic stem cell  
5 transplantation – a qualitative study of patient experiences  
6

---

**Authors**

10 Lene Østergaard Jepsen, MD, PhD<sup>1</sup>

12 Lone Smidstrup Friis, MD, PhD<sup>2</sup>

14 Mette Terp Høybye, MSc, PhD<sup>3,4</sup>

16 Claus Werenberg Marcher, MD, PhD<sup>1</sup>

18 Dorte Gilså Hansen, Ass. Professor, MD, PhD<sup>5</sup>

**Affiliations**

1. Department of Hematology, Odense University Hospital, Denmark
2. Department of Hematology, National University Hospital, Copenhagen, Denmark
3. Interdisciplinary Research Unit, Elective Surgery Center, Silkeborg Regional Hospital, Denmark
4. Interacting Minds Center, Department of Clinical Medicine, Aarhus University, Denmark
5. The National Research Center of Cancer Rehabilitation, Research Unit of General Practice, University of Southern Denmark

**Correspondence**

41 Lene Østergaard Jepsen, MD, PhD

42 Odense University Hospital

43 Department of Hematology

44 Sdr. Boulevard 29

45 DK-5000 Odense C

46 Denmark

47 Tel: +45 2892 1581

48 E-mail: lene.jepsen@rsyd.dk

Manuscript 3

## Abstract

### Objectives

The diagnosis and treatment of acute leukemia affect physical, psychosocial and existential functioning. Long-lasting treatment periods with impaired immune system, hygienic and social restrictions challenge patient well-being and rehabilitation as compared to other cancer patients. This study elucidates how acute leukemia patients, treated with curative intent in an outpatient setting assess their physical, psychosocial and existential capability during and following treatment, and furthermore reports on the health initiatives offered to support their rehabilitation.

### Design, setting, participants and interventions

We conducted qualitative, semi-structured individual interviews with 16 acute leukemia patients, six months after end of treatment in the patients' home. This was the final interview, in a line of three carried out as part of a larger qualitative study.

### Results

None of the patients were satisfied with their physical capability at the time of interview and experienced substantial impairment of functional capabilities. For the majority of the patients, their sole exercise during treatment was the performance of daily chores. Later on exercise levels and physical abilities differed from patient to patient. All patients struggled with anxiety and expressed a need for continuous progress in treatment and well-being to be feeling safe. It took an unexpected effort to regain a meaningful social life and patients still had to prioritize activities.

### Conclusions

Acute leukemia patients suffered physically, psychologically and existentially throughout their illness trajectory. Rehabilitation initiatives deriving from the health care system and municipalities held room for improvement. The physical activity in daily chores was manageable and should be encouraged in future rehabilitation programs.

## Manuscript 3

**Summary****Strength and limitations of the study**

- A relatively small number of participants impede generalization to the wider population of hematological cancer patients
- The patients showed a high degree of self-preservation instinct during the illness trajectory, which may indicate a selection bias
- The theoretical framework of rehabilitation may strengthen the possibility of analytical generalization

**Funding**

This work was supported by the University of Southern Denmark 400.000 Kr., the Region of Southern Denmark 500.000 Kr., The Danish Cancer Society 465.000 Kr., the Anders Hasselbalch Foundation 20.000 Kr., the Family Hede Nielsen Foundation 25.000 Kr. and the joint research pool between National University Hospital and Odense University Hospital supporting the highly-specialized functions 40.000 Kr.. The National Research Center of Cancer Rehabilitation, University of Southern Denmark is partly funded by the Danish Cancer Society.

**Conflicts of interest**

The authors declare that they have no conflicts of interest.

**Author contribution**

LJ participated in the design of the study, carried out the interviews, analysed data and drafted the manuscript. LF participated in the design of the study and in the discussion of the analysis and the results. She also critically revised the manuscript important intellectual content. CM participated in the discussion of the analysis and the results. He also critically revised the manuscript important intellectual content. MH participated in the design of the study and in the discussion of the analysis and the results. She also critically revised the manuscript important intellectual content. DH participated in the design of the study and in the

## Manuscript 3

1  
2  
3  
4 discussion of the analysis and the results. She also critically revised the manuscript important intellectual  
5  
6 content. All authors read and approved the final manuscript.  
7  
8  
9

**Patient consent form**

10  
11 Written informed consent for publication of their transcribed interviews was obtained from the patients and  
12  
13 their spouses. A copy of the consent form is available for review by the Editor of this journal.  
14  
15  
16

**Data sharing**

17  
18 The dataset generated and analyzed during the current study are not publicly available because it is  
19  
20 containing information that could compromise research participant privacy but are available from the  
21  
22 corresponding author on reasonable request.  
23  
24  
25

**Keywords**

26  
27  
28 Rehabilitation, acute leukemia, everyday life, qualitative study  
29  
30  
31  
32

**Word count**

33  
34 3.505  
35  
36  
37  
38  
39  
40  
41  
42  
43  
44  
45  
46  
47  
48  
49  
50  
51  
52  
53  
54  
55  
56  
57  
58  
59  
60

## Manuscript 3

**Introduction**

Patients with acute leukemia (AL) undergo extraordinary long periods of intensive treatment with high susceptibility to sudden and dramatic changes in their health condition and prognosis [1]. Impairment of the immune system necessitates substantial hygienic and social restrictions. However, during the last decade outpatient management has been introduced and has increased. Rehabilitation needs and offers are challenged by these changes. Little clinical or research attention has been paid to rehabilitation and survivorship care for this specific group of cancer patients.

In this paper the concept of rehabilitation refers to specific initiatives and efforts by health professionals but is also an analytical concept to describe the process in which the patients reframe a sense of self [2].

The existing knowledge underlines beneficial effects of rehabilitation to cancer patients. From few studies, we know that physical exercise is feasible and safe for AL inpatients, even those with critical cytopenia. Beneficial effects on physical performance, fatigue and quality of life have been shown [3-9]. As an example a six week supervised exercise and health counseling intervention to AL patients during outpatient management showed physical, functional, psychosocial, and symptom benefits [8]. Patients undergoing allogenic hematopoietic stem cell transplantation (HSCT) due to hematological malignancies have also shown significant benefit from exercise interventions without reports of negative effects [9].

Health-related quality of life of hematological cancer patients is lowered mainly due to reduced role functioning, insomnia and fatigue [10,11]. Unmet needs of rehabilitation are strongly associated with impaired quality of life for cancer patients in general [12]. Psychological counseling, physical rehabilitation, sexual and financial support and practical help have been found to be important but needs vary with age, gender and cancer diagnosis [13,14].

The existing knowledge underlines the beneficial effects of rehabilitation. However, the rapid changes of treatment setting, patient population and lack of knowledge of existing evidence may leave patients with unmet needs and functional impairment. Bridging the knowledge gap between existing rehabilitation and the

Manuscript 3

1  
2  
3  
4 expectations of patients intensively treated for AL may inspire future rehabilitation initiatives, and through  
5  
6 these improve wellbeing of an increasing and still older group of patients.  
7

8  
9 Based on patient interviews this paper elucidates how AL patients treated with curative aim assess their  
10  
11 physical, psychosocial and existential capability during and following treatment and health initiatives  
12  
13 supporting their rehabilitation.  
14

## 15 16 **Material and methods**

### 17 18 **Design**

19  
20 The material derives from individual interviews with 16 patients, six months after end of treatment. These  
21  
22 interviews were the third and final interview, conducted as part of a larger qualitative study, which combined  
23  
24 participant observation in the outpatient setting (OPS), individual patient interviews, and group or individual  
25  
26 interviews with their relatives [15,16].  
27

28  
29 Semi-structured interviews were conducted based on a thematic interview guide [15]. The first topic was  
30  
31 ‘impact on everyday life practices’ where rehabilitation issues were addressed by questions such as ‘Try to  
32  
33 describe your present physical capability and how you reached that level’. The question was repeated for  
34  
35 psychosocial and existential well-being. The second topic ‘the home’ explored daily life at home and the  
36  
37 roles of the family whereas the third topic ‘hygiene’ addressed the impact of intense hygiene requirements.  
38  
39

40  
41 Patients were not involved in the research design.  
42

### 43 44 **Participants and interviews**

45  
46 Participants were Danish speaking AL patients intensively treated with a curative aim. All were managed in  
47  
48 the OPS, ‘the Home Unit’ at the Department of Hematology, Odense University Hospital (OUH) and  
49  
50 subsequently followed in the outpatient clinic at OUH or at the National University Hospital, Copenhagen or  
51  
52 at Aarhus University Hospital if allogenic transplanted [15].  
53

54  
55 Twenty-six patients were included consecutively from May 2013 to August 2014, and out of this group 16  
56  
57 took part in this third interview six months after end of treatment (Figure 1). Table 1 shows the demographic  
58  
59  
60



## Manuscript 3

1  
2  
3  
4 characteristics. The interviews were conducted in the patients' home and lasted from 40 to 115 minutes  
5  
6 (mean 68 minutes). All interviews were digitally recorded.  
7

### 8 9 **Context for rehabilitation**

10  
11 Rehabilitation has previously been understood as a practice related to the post-treatment life of patients, but  
12  
13 expectations have changed. The facilities and practices of the hospital during in- and outpatient management  
14  
15 may be considered a context of rehabilitation of AL patients.  
16

17  
18 Each year the Department of Hematology, OUH receives about 45 newly diagnosed AL patients who are  
19  
20 candidates for curative intended chemotherapy. The course of treatment contains periods as inpatient as well  
21  
22 as periods as outpatient where the patients during periods with severe hematological cytopenia, stay at home  
23  
24 and appear at follow-up visits every second day [15].  
25

26  
27 The OPS was situated next to the hematological department, OUH. Both in- and outpatients could use the  
28  
29 fitness facilities located within the department. A physiotherapist was present twice a week to instruct the  
30  
31 patients. During treatment patients could request a referral to a physiotherapist, a psychologist, a chaplain or  
32  
33 a medical social worker at the department.  
34

35  
36 Before receiving the transplant, patients were instructed in some simple exercises by a physiotherapist.  
37  
38 Furthermore, all patients had an exercise-bike in their bed-room during periods of isolation.  
39

40  
41 Psychologists from The Danish Cancer Society were available to patients and relatives in facilities close to  
42  
43 the hospital.  
44

45  
46 In Denmark, the overall responsibility of rehabilitation is located at the local municipality levels (98  
47  
48 municipalities/5.6 million inhabitants) with different rehabilitation offers and knowledge about cancer and  
49  
50 AL due to different populations, staff and geographic size [17].  
51

### 52 53 **Theoretical framework and analysis**

54  
55 The study took outset in the World Health Organization definition of rehabilitation [18], but simultaneously  
56  
57 acknowledged that rehabilitation formed an analytical approach to the physical, psychosocial and existential  
58  
59  
60

## Manuscript 3

1  
2  
3  
4 challenges facing the AL patients, and was not a structural or organizational intervention as such. This paper  
5 aims to study the configuration of rehabilitation needs as experienced by AL patients and to draw attention to  
6 possible contextual factors that should be taken into account in future programs. To further support our  
7 analytical exploration, the theoretical framework included International Classification of Functioning,  
8 Disability and Health (ICF) pointing out the interaction of health condition, body function and structure,  
9 activity, participation, and personal as well as environmental factors [19].

10  
11  
12  
13  
14  
15  
16  
17  
18 The data was analyzed thematically through an inductive ongoing process of four steps inspired by Miles and  
19 Huberman [20]. First, the interviews were transcribed by a secretary and read several times by LØJ to gain  
20 an overall understanding of the material. Secondly, specific text pieces were identified as the content and  
21 context related to each other and the study aim. Thirdly, descriptive codes were produced and assigned.  
22  
23  
24  
25  
26 Finally, the text was condensed into categories. The group of authors discussed the meanings and  
27 understandings during the whole process.

### 28 29 30 31 **Ethics**

32  
33 Informed consent was obtained from all individual study participants. The study was approved by The  
34 Regional Scientific Ethical Committees for Southern Denmark (S-20122000 86), the Danish Data Protection  
35 Agency (J. no. 2008-58-0035) and the Department of Hematology, OUH. The first author had no  
36 professional medical interaction with the participants during the study period. We carefully recognize that  
37 participation in research while undergoing treatment for a serious illness puts strain on patients.  
38  
39  
40  
41  
42  
43

### 44 45 **Results**

46  
47 Patients did not use the word 'rehabilitation' about the process of regaining physical, mental and social  
48 functioning. Rehabilitation was therefore an analytical condensation of the AL patients' assessments of their  
49 capability and experiences of supportive initiatives. Subcategories of physical activity, mental well-being  
50 and social activity were constructed. Existential reflections and challenges emerged during interviews.  
51  
52  
53

54  
55  
56 Reorganization of the everyday life practices was a first step for many of the patients. This process began  
57 when being discharged from hospital the first time and continued after end of treatment. They described how  
58  
59  
60

## Manuscript 3

1  
2  
3  
4 they had lacked the energy to participate in a full day's program, and for example had escalated activities  
5  
6 from twice a week to every second day and from one to five hours. Their pace was still slow through all  
7  
8 activities, and a nap in the afternoon was often needed. They preferred projects without a deadline (Table 2,  
9  
10 quote 1).

11  
12  
13 Limited house-keeping tasks, such as cutting the grass or vacuuming the house which would have posed no  
14  
15 problem prior to the onset of illness were now 'physically demanding'. This challenged them substantially  
16  
17 and greatly impacted their daily lives and psychosocial well-being. They had expected this during treatment  
18  
19 but six months after end of treatment, the patients had expected to be 'back to normal'.  
20  
21

### 22 **Physical activity**

23  
24 Nearly all patients reported that they went for walks, but the intensity, the distance and how often varied  
25  
26 between patients and times during the illness trajectory. Some patients with neuropathy in the feet could only  
27  
28 walk brief distances, whereas others walked for 1½ hour. The simple exercises, including the use of elastic  
29  
30 exercise bands, as instructed at OUH were used by many patients (Table 3, quote 1).  
31  
32

33  
34 Referral from the hospital to the municipality for rehabilitation services was not systematic. The service  
35  
36 offered by the municipalities comprised group training with other types of patients, one hour twice a week  
37  
38 for six to twelve weeks. All experienced to be the only patient with AL/HSCT. By the end of the course of  
39  
40 training many were told that they performed too well to continue in the group. The patients described a lack  
41  
42 of enthusiasm and competences by the health care professionals in the municipalities (Table 3, quote 3).  
43  
44

45  
46 After concluding chemotherapy, a handful of patients exercised more intensively in a fitness center; did bike  
47  
48 rides of 50 kilometers, swims of 1000 meters or three to four kilometers of running. They wanted to regain  
49  
50 their usual physical strength and fitness but also aimed to be prepared if the AL relapsed (Table 3, quote 2).  
51

52  
53 None of the patients were satisfied with their physical status six months after the end of treatment or with  
54  
55 being less capable than expected. In hindsight they reflected that it had been too easy to 'escape' the  
56  
57 physiotherapist during hospitalization. They did not remember having been encouraged to be physically  
58  
59 active when referred to the OPS. In the first interviews [15] the patients described how they prioritized  
60

## Manuscript 3

1  
2  
3  
4 socializing with fellow patients in the OPS to the detriment of physical training. Still, they did not participate  
5  
6 in organized training but were more active through all the unnoticed activities at home, such as doing the  
7  
8 laundry, the dishes or walking the stairs [15]. However, activities that were part of their everyday life were  
9  
10 not perceived by patients as exercise.  
11

12  
13 The outcome of training programs offered by the municipality was experienced by the patients as low, and  
14  
15 they often performed too well to continue the program. Being evaluated in this way seemed  
16  
17 counterproductive to their motivation to continue training and produced dissatisfaction with their own  
18  
19 physical capability at the time of the last interview. The lack of physical capability still prevented the  
20  
21 patients from engaging in everyday life activities as they used to and wanted to.  
22  
23

### 24 **Mental well-being**

25  
26 The treatment and the physical capability strongly influenced the mental well-being of the patients. When  
27  
28 not feeling better or when physical symptoms caused uncertainty the patients felt challenged (Table 4, quote  
29  
30 1).  
31

32  
33 Anxiety was always present but seldom shown, patients reported. Small things like a spot on the skin  
34  
35 initiated a flow of thoughts: graft versus host disease – AL relapse – death. One way to avoid these thoughts  
36  
37 was to be occupied with practical tasks and another way was to talk to family members or friends. All  
38  
39 patients used these coping strategies to a varying extent, and furthermore they talked to fellow-patients, when  
40  
41 meeting in the OPS.  
42  
43

44  
45 AL had challenged their invulnerability and sense of self which was usually shaped by work or social  
46  
47 activities. Therefore, many patients raised the existential question: ‘Who am I – besides being a leukemia  
48  
49 patient?’ (Table 4, quote 2). Patients had perceived that being cured was the end of the illness trajectory. The  
50  
51 stepwise prolongation experienced by everyone was psychologically draining. Furthermore, it was hard  
52  
53 never to be given a ‘cured-date’. As an alternative some patients made their own goals for when to view  
54  
55 themselves as cured (Table 4, quote 3).  
56  
57  
58  
59  
60

## Manuscript 3

1  
2  
3  
4 Few patients had consulted a psychologist during the illness trajectory. The majority experienced no need to,  
5  
6 especially not in the beginning when survival and physical issues had priority. Later, it was a barrier to seek  
7  
8 counseling knowing they would have to describe their illness trajectory once again.  
9

10  
11 Mental well-being was influenced by flow in treatment and physical capability. Most patients addressed the  
12  
13 mental challenges by talking to family and friends, which was also reflected by the fact that few patients had  
14  
15 contacted a psychologist.  
16

**Social activity**

17  
18  
19 As previously described the social life of patients suffered while being inpatients, while outpatient  
20  
21 management allowed for more time spent together with fellow patients. This type of community became an  
22  
23 important and highly valued part of their social life [15].  
24  
25

26  
27 The difference between friends and acquaintances became more apparent as time went by. Losing contact  
28  
29 with persons previously counted as friends was a mental strain (Table 5, quote 1). As the trajectory proceed  
30  
31 patients wanted the conversation to turn away from illness and treatment on to everyday things and the future  
32  
33 (Table 5, quote 2).  
34  
35

36  
37 The treatment precautions during periods with severe hematological neutropenia meant that patients only  
38  
39 saw a few people at a time and that nearly all social activity took place at home or at the hospital. Returning  
40  
41 to a more regular social life after end of treatment was overwhelming and unexpectedly demanding (Table 5,  
42  
43 quote 3).  
44

45  
46 Six months after the end of treatment the energy level of patients was still impaired. Patients thus had to  
47  
48 choose for themselves what to participate in, and social activities were in competition with practical tasks,  
49  
50 physical activity and work (Table 5, quote 4).  
51

52  
53 The patients described how it was unexpectedly demanding to regain a meaningful social life. None of the  
54  
55 patients experienced or expected that social life had the attention of professional intervention.  
56  
57  
58  
59  
60

Manuscript 3

## Discussion

Six months after the end of treatment AL patients were dissatisfied with their physical, psychological and social capability. The rehabilitation support during all phases of treatment including HSCT and the following phase of recovery were experienced as non-existing, minimal or inadequate.

Patients did not exercise as much as they wanted to. This seemed in line with a long hematological tradition of avoiding physical training during periods of cytopenia even though a recent study has shown that patients may be able to attend physical training and benefit from this during treatment [8,21]. Less contact with healthcare professionals during outpatient management and thereby less focus on the potential benefits of physical activity may also serve as an explanation. In our study six months after the end of treatment, patients did not recall that there might have been attention to physical activity during the course of treatment. At the same time they describe having refused the physiotherapist's training offer and prioritized the social engagement while at the OPS [15]. It was a deliberate choice showing that the patients' attitude towards training changed during the treatment period. They had no motivation for physical training during the first part of the illness trajectory but felt highly motivated after end of treatment. According to the patients the municipalities did not offer training courses matching their needs – at that time. Some patients experienced that they were performing too well to participate which contrasted their own perception of lacking physical capabilities to participate in everyday activities. Individual needs assessment based on the ICF-model could assist future patients as well as the responsible practitioners in the municipalities to evaluate the functional level and performance of individual patients [19].

It is relevant to consider that there is a difference between the patients' attitudes and concrete actions regarding physical training during treatment. In the late modern society, patients are expected to take individual responsibility for their own health and health behavior – such as physical exercise, healthy food and so on [22]. It may be experienced as stigmatizing to the patients not to satisfy such expectations. This could, as a context for blaming the health care system for a lack of attention, moving the responsibility away from the self and to the system [22,23].

## Manuscript 3

1  
2  
3  
4 In line with the ICF-model the treatment and the physical capability strongly influenced the mental well-  
5 being of the patients [19]. Few patients called for easier access to psychologists but the majority found no  
6 need since they experienced support from family, friends and other health care professionals. This is in line  
7 with a questionnaire study among 132 mixed hematological and oncological patients [24]. Internationally,  
8 systematic needs assessment has been recommended as part of routine cancer care to uncover substantial  
9 needs for professional support that would otherwise not be addressed [18]. However, none of the patients in  
10 our study have had such a consultation. Another explanation to the sparse demand for psychological support  
11 may be that the weakest patients declined to participate in the study, had left, or that demanding existential  
12 problems surface later.  
13  
14

15  
16  
17  
18  
19  
20  
21  
22  
23  
24 The patients had to prioritize caring for themselves even though it sometimes caused emotional limbo, as  
25 described in a previous focus group interview study of mixed cancer patients [25]. Social reintegration  
26 unexpectedly required an effort, and they had to challenge themselves step-by-step. None seemed to expect  
27 professional help and no one stated that they should have been warned of the social challenges. This gives  
28 the impression that the patients made no connection between their social life and the possibility of  
29 professional support, e.g. as part of rehabilitation in line with the definition [18] and ICF-model [19].  
30  
31  
32  
33  
34  
35  
36

### 37 **Strength and limitations**

38  
39  
40 The study design with a relatively small number of participants impedes generalization to the wider  
41 population of hematological cancer patients. The majority of patients received a HSCT as the final treatment  
42 entity, and we were not able to differentiate our analysis in this regard. The patients showed a high degree of  
43 self-preservation instinct during the illness trajectory, which may indicate a selection bias. However, the  
44 theoretical framework of rehabilitation may strengthen the possibility of analytical generalization. Using the  
45 ICF-model as basis of the data analysis, the focus was on physical, psychological and social functioning of  
46 the body, activity and participation together with health-related and environmental factors. In a  
47 rehabilitation perspective of this specific group of cancer patients six months after intensive treatment seems  
48 a short time. Additional data after one year or longer may show other aspects and perspectives on for  
49 example, late mental or existential problems that cause other needs for rehabilitation.  
50  
51  
52  
53  
54  
55  
56  
57  
58  
59  
60

Manuscript 3

### Perspectives

This study has several implications for future patients. The patients wanted the rehabilitation process to begin shortly after the start of treatment. This is in line with all rehabilitation recommendations [19,18] and highlights the need for focus on maintaining instead of catching up lost capabilities.

The need for continuous motivation by health care professionals was underlined. Patients' understanding of and focus on the importance of physical activity for future performance are important, especially on days with exhausting symptoms or bad mood. Even minor everyday activities like the change of linen counter loss of muscle and impaired physical capability [8]. Simple exercises could be introduced shortly after the start of treatment and be supervised through treatment including the OPS. Perhaps it is possible to couple these with social engagement with fellow patients. This may support continuity and activities across different hospitals, home and municipality initiatives improving well-being and quality of life among patients.

Psychological counseling may support some patients, but health care professionals should be aware of patient barriers rising from the need to 'tell their story' once more.

A review of the evidence for the treatment initiated precautions can lead to improve patients' participation in role functioning, family- and social life. Furthermore this study suggests timely preparation of patient and family members for them to understand that regaining a normal social life after end of treatment will be another demanding phase.

### Conclusion

In conclusion, the findings of this study contribute to our understanding of how AL outpatients treated with curative intension, including HSCT, experience rehabilitation up to six months after end of treatment.

None of the patients were satisfied with their physical capability six months after end of treatment. They managed to be physically active through daily tasks and had not experienced being offered an exercise program matching their needs at the end of treatment when their motivation for being physically active arose. Psychologically the patients struggled with anxiety with regards to infections or relapse, and their perceived needs for progress in the treatment and in everyday functioning to feel well. Talking to family and friends



## Manuscript 3

1  
2  
3  
4 was experienced as a good way of addressing psychological challenges. The precautions stipulated by the  
5  
6 hospitals restricted social life and it unexpectedly demanded an effort by the patients to regain a meaningful  
7  
8 social life.  
9

10  
11 Room for improvement of rehabilitation initiatives, from both the health care system and the municipalities,  
12  
13 has been identified. Regular needs assessment should be used to understand changes in health and motivation  
14  
15 during the illness trajectory. Health care professionals should remember that six months after end of  
16  
17 treatment is too early to expect full recovery of many everyday basic skills. For the benefit of the patients,  
18  
19 information about the rehabilitation process can be given up front, but must be addressed continuously.  
20  
21

### 22 23 24 **Acknowledgements**

25  
26 The authors wish to thank all the patients who participated in the study for their valuable contributions  
27  
28 during a difficult period of their lives. This study was funded by the University of Southern Denmark, the  
29  
30 Region of Southern Denmark, The Danish Cancer Society, the Anders Hasselbalch Foundation, the Family  
31  
32 Hede Nielsen Foundation and the joint research pool between National University Hospital and Odense  
33  
34 University Hospital supporting the highly-specialized functions. The National Research Center of Cancer  
35  
36 Rehabilitation, University of Southern Denmark is partly funded by the Danish Cancer Society.  
37  
38

### 39 40 **References**

- 41 1. Walter RB, Taylor LR, Gardner KM, Dorcy KS, Vaughn JE, Estey EH (2013) Outpatient management  
42 following intensive induction or salvage chemotherapy for acute myeloid leukemia. *Clin Adv Hematol*  
43 *Oncol* 11 (9):571-577
- 44 2. Messinger SD (2010) Getting past the accident: explosive devices, limb loss, and refashioning a life in a  
45 military medical center. *Med Anthropol Q* 24 (3):281-303
- 46 3. Elter T, Stipanov M, Heuser E, von Bergwelt-Baildon M, Bloch W, Hallek M, Baumann F (2009) Is  
47 physical exercise possible in patients with critical cytopenia undergoing intensive chemotherapy for acute  
48 leukaemia or aggressive lymphoma? *Int J Hematol* 90 (2):199-204. doi:10.1007/s12185-009-0376-4
- 49 4. Dimeo F, Schwartz S, Fietz T, Wanjura T, Boning D, Thiel E (2003) Effects of endurance training on the  
50 physical performance of patients with hematological malignancies during chemotherapy. *Support Care*  
51 *Cancer* 11 (10):623-628. doi:10.1007/s00520-003-0512-2
- 52 5. Battaglini CL, Hackney AC, Garcia R, Groff D, Evans E, Shea T (2009) The effects of an exercise  
53 program in leukemia patients. *Integr Cancer Ther* 8 (2):130-138. doi:10.1177/1534735409334266
- 54 6. Alibhai SM, O'Neill S, Fisher-Schlombs K, Breunis H, Brandwein JM, Timilshina N, Tomlinson GA,  
55 Klepin HD, Culos-Reed SN (2012) A clinical trial of supervised exercise for adult inpatients with acute  
56 myeloid leukemia (AML) undergoing induction chemotherapy. *Leuk Res* 36 (10):1255-1261.  
57 doi:10.1016/j.leukres.2012.05.016  
58  
59  
60

- 1
- 2
- 3
- 4
- 5 7. Alibhai SM, Durbano S, Breunis H, Brandwein JM, Timilshina N, Tomlinson GA, Oh PI, Culos-Reed SN (2015) A phase II exercise randomized controlled trial for patients with acute myeloid leukemia undergoing induction chemotherapy. *Leuk Res*. doi:10.1016/j.leukres.2015.08.012
- 6
- 7
- 8 8. Jarden M, Adamsen L, Kjeldsen L, Birgens H, Tolver A, Christensen JF, Stensen M, Sorensen VA, Moller T (2013) The emerging role of exercise and health counseling in patients with acute leukemia undergoing chemotherapy during outpatient management. *Leuk Res* 37 (2):155-161. doi:10.1016/j.leukres.2012.09.001
- 9
- 10 9. Wiskemann J, Huber G (2008) Physical exercise as adjuvant therapy for patients undergoing hematopoietic stem cell transplantation. *Bone Marrow Transplant* 41 (4):321-329. doi:10.1038/sj.bmt.1705917
- 11
- 12
- 13 10. Johnsen AT, Tholstrup D, Petersen MA, Pedersen L, Groenvold M (2009) Health related quality of life in a nationally representative sample of haematological patients. *Eur J Haematol* 83 (2):139-148. doi:10.1111/j.1600-0609.2009.01250.x
- 14
- 15
- 16 11. Hoybye MT, Dalton SO, Christensen J, Larsen LR, Kuhn KG, Jensen JN, Carlsen K, Johansen C (2008) Research in Danish cancer rehabilitation: social characteristics and late effects of cancer among participants in the FOCARE research project. *Acta Oncol* 47 (1):47-55. doi:10.1080/02841860701418846
- 17
- 18 12. Hansen DG, Larsen PV, Holm LV, Rottmann N, Bergholdt SH, Sondergaard J (2013) Association between unmet needs and quality of life of cancer patients: a population-based study. *Acta Oncol* 52 (2):391-399. doi:10.3109/0284186x.2012.742204
- 19
- 20 13. Veloso AG, Sperling C, Holm LV, Nicolaisen A, Rottmann N, Thayssen S, Christensen RD, Lehmann Knudsen J, Hansen DG (2013) Unmet needs in cancer rehabilitation during the early cancer trajectory--a nationwide patient survey. *Acta Oncol* 52 (2):372-381. doi:10.3109/0284186x.2012.745648
- 21
- 22 14. Holm LV, Hansen DG, Johansen C, Vedsted P, Larsen PV, Kragstrup J, Sondergaard J (2012) Participation in cancer rehabilitation and unmet needs: a population-based cohort study. *Support Care Cancer* 20 (11):2913-2924. doi:10.1007/s00520-012-1420-0
- 23
- 24 15. Jepsen LO, Hoybye MT, Hansen DG, Marcher CW, Friis LS (2015) Outpatient management of intensively treated acute leukemia patients-the patients' perspective. *Support Care Cancer*. doi:10.1007/s00520-015-3012-2
- 25
- 26 16. La Cour K, Nordell K, Josephsson S (2009) Everyday lives of people with advanced cancer: Activity, time, location, and experience. *OTJR Occupation, Participation and Health* 29 (4):154-162. doi:10.3928/15394492-20090914-03
- 27
- 28 17. Kristiansen M, Adamsen L, Brinkmann FK, Krasnik A, Hendriksen C (2015) Need for strengthened focus on cancer rehabilitation in Danish municipalities. *Dan Med J* 62 (4):A5045
- 29
- 30 18. World Health Organization - Rehabilitation (2015).
- 31 19. World Health Organization - International Classification of Functioning, Disability and Health (ICF) (2001).
- 32
- 33 20. Miles MB, Huberman AM, Saldaña J (2014) *Qualitative data analysis : a methods sourcebook*. 3 edn. Sage, Thousand Oaks, CA
- 34
- 35 21. Midtgaard J, Baadsgaard MT, Moller T, Rasmussen B, Quist M, Andersen C, Rorth M, Adamsen L (2009) Self-reported physical activity behaviour; exercise motivation and information among Danish adult cancer patients undergoing chemotherapy. *Eur J Oncol Nurs* 13 (2):116-121. doi:10.1016/j.ejon.2009.01.006
- 36
- 37 22. Lupton D (1997) Consumerism, reflexivity and the medical encounter. *Soc Sci Med* 45 (3):373-381
- 38
- 39 23. Parsons T (1970) *The social system*. Reprinted edn. Routledge & Kegan Paul, London
- 40
- 41 24. Plass A, Koch U (2001) Participation of oncological outpatients in psychosocial support. *Psychooncology* 10 (6):511-520
- 42
- 43 25. Mikkelsen TH, Sondergaard J, Jensen AB, Olesen F (2008) Cancer rehabilitation: psychosocial rehabilitation needs after discharge from hospital? *Scand J Prim Health Care* 26 (4):216-221. doi:10.1080/02813430802295610
- 44
- 45
- 46
- 47
- 48
- 49
- 50
- 51
- 52
- 53
- 54
- 55
- 56
- 57
- 58
- 59
- 60

Figure 1: Enrollment of patients

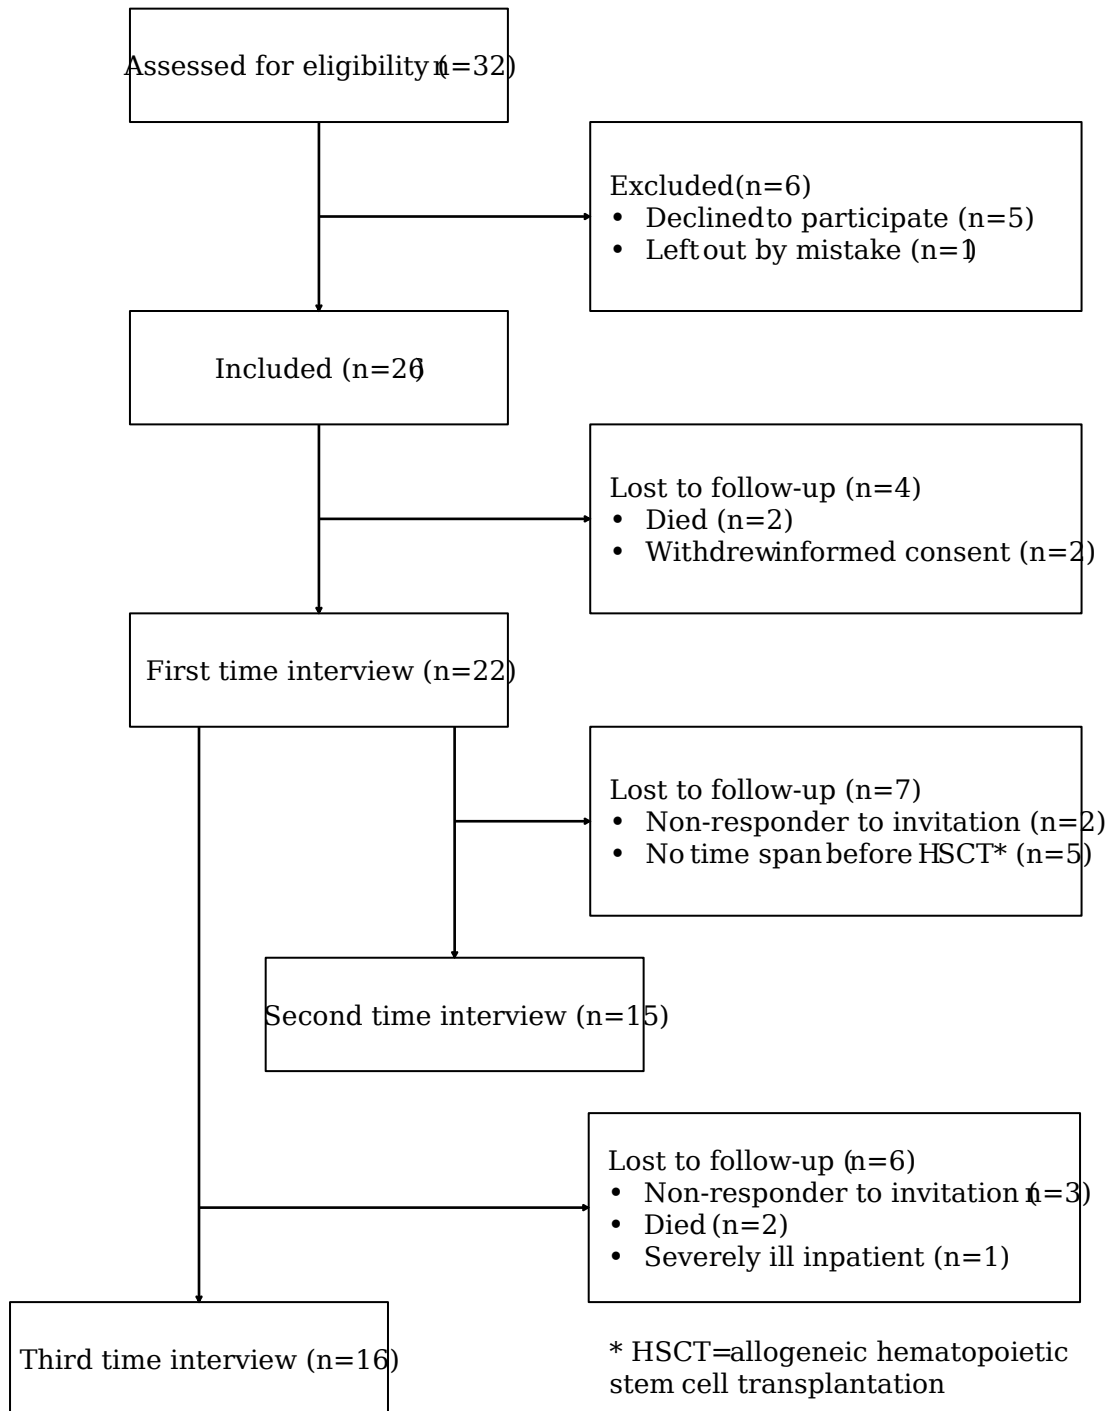

| Table 1 Demographic characteristics of study participants (n=16)                                      |                         |
|-------------------------------------------------------------------------------------------------------|-------------------------|
| Sample characteristics                                                                                | Description             |
| Gender                                                                                                |                         |
| Male                                                                                                  | 9 (56 %)                |
| Female                                                                                                | 7 (44 %)                |
| Age (years)                                                                                           |                         |
| < 60                                                                                                  | 8 (50 %)                |
| ≥ 60                                                                                                  | 8 (50 %)                |
| Marital status                                                                                        |                         |
| Married or common-law relationship                                                                    | 13 (81 %)               |
| Single/divorced                                                                                       | 3 (19 %)                |
| Education                                                                                             |                         |
| Unskilled workers                                                                                     | 2 (12 %)                |
| Skilled workers                                                                                       | 10 (63 %)               |
| Further education                                                                                     | 4 (25 %)                |
| Diagnosis                                                                                             |                         |
| Acute myeloid leukemia (AML)                                                                          | 11 (69 %) (3 relapse)   |
| Chronic myeloid leukemia in myeloid blast crisis (CML)                                                | 1 (6 %)                 |
| Chronic myelomonocytic leukemia (CMML)                                                                | 1 (6 %)                 |
| Refractory anemia with excess blasts (RAEB)                                                           | 1 (6 %)                 |
| Acute lymphoblastic leukemia (ALL)                                                                    | 2 (13 %)                |
| Time from diagnosis to third interview (weeks)                                                        | Mean 51.9 ; range 40-72 |
| Treatment status                                                                                      |                         |
| Outpatient Clinic follow-up                                                                           | 3 (19 %)                |
| Allogenic hematopoietic stem cell transplantation,<br><i>National University Hospital, Copenhagen</i> | 8 (50 %)                |
| Allogenic hematopoietic stem cell transplantation,<br><i>Aarhus University Hospital</i>               | 2 (12 %)                |

1  
2  
3  
4  
5  
6  
7  
8  
9  
10  
11  
12  
13  
14  
15  
16  
17  
18  
19  
20  
21  
22  
23  
24  
25  
26  
27  
28  
29  
30  
31  
32  
33  
34  
35  
36  
37  
38  
39  
40  
41  
42  
43  
44  
45  
46  
47  
48  
49  
50  
51  
52  
53  
54  
55  
56  
57  
58  
59  
60

|                                                    |          |
|----------------------------------------------------|----------|
| Second line therapy,<br>Odense University Hospital | 3 (19 %) |
|----------------------------------------------------|----------|

For peer review only

1  
2  
3  
4  
5  
6  
7  
8  
9  
10  
11  
12  
13  
14  
15  
16  
17  
18  
19  
20  
21  
22  
23  
24  
25  
26  
27  
28  
29  
30  
31  
32  
33  
34  
35  
36  
37  
38  
39  
40  
41  
42  
43  
44  
45  
46  
47  
48  
49  
50  
51  
52  
53  
54  
55  
56  
57  
58  
59  
60

| Table 2 Sample statements from participants |         |                                                                                                                                                                                                  |
|---------------------------------------------|---------|--------------------------------------------------------------------------------------------------------------------------------------------------------------------------------------------------|
| Quote                                       | Patient | Statement                                                                                                                                                                                        |
| 1                                           | 25      | 'If I have to do something that is physically demanding, it will have to be something that I can go on and off. Otherwise I will not begin because I know that I will not be able to finish it.' |

For peer review only

1  
2  
3  
4  
5  
6  
7  
8  
9  
10  
11  
12  
13  
14  
15  
16  
17  
18  
19  
20  
21  
22  
23  
24  
25  
26  
27  
28  
29  
30  
31  
32  
33  
34  
35  
36  
37  
38  
39  
40  
41  
42  
43  
44  
45  
46  
47  
48  
49  
50  
51  
52  
53  
54  
55  
56  
57  
58  
59  
60

| Quote | Patient | Statement                                                                                                                                                                                                                                                                                                                                                                 |
|-------|---------|---------------------------------------------------------------------------------------------------------------------------------------------------------------------------------------------------------------------------------------------------------------------------------------------------------------------------------------------------------------------------|
| 1     | 10      | 'I've only made those exercises and I feel a little – guilty about it because they said: You should just [walk] half an hour round the neighborhood. [] I'm a little afraid to fall. The energy level is also crucial. But now for example to day I would be able to do it. I would be able to walk half an hour. But then tomorrow maybe I'm just as limp as a dishrag.' |
| 2     | 23      | 'For me, who comes with muscles, which are nor destroyed or cut in but just slack after lying in a bed – the training [arranged by the municipality] is worth nothing.'                                                                                                                                                                                                   |
| 3     | 18      | 'So I was active. [] But I also think I had constantly in my mind – if the – my leukemia comes back, I'll fucking be in good shape, right.'                                                                                                                                                                                                                               |

1  
2  
3  
4  
5  
6  
7  
8  
9  
10  
11  
12  
13  
14  
15  
16  
17  
18  
19  
20  
21  
22  
23  
24  
25  
26  
27  
28  
29  
30  
31  
32  
33  
34  
35  
36  
37  
38  
39  
40  
41  
42  
43  
44  
45  
46  
47  
48  
49  
50  
51  
52  
53  
54  
55  
56  
57  
58  
59  
60

| Quote | Patient | Statement                                                                                                                                                                                                                                                                                                                                                                                                                    |
|-------|---------|------------------------------------------------------------------------------------------------------------------------------------------------------------------------------------------------------------------------------------------------------------------------------------------------------------------------------------------------------------------------------------------------------------------------------|
| 1     | 19      | 'But I think psychologically or mentally we are pretty strong. That's not a problem, right. That I can recognize clearly. The only time I got a knock, right, was when the one kidney stopped working. There I thought damn, what is brewing now. Because it was like, it is after all a serious matter, right and it is obviously clear that it had to do with everything else – in some wired way.'                        |
| 2     | 23      | 'Principally you are a lot because of you training and the background you have and what you do.'                                                                                                                                                                                                                                                                                                                             |
| 3     | 25      | 'Your status gets chronic. I have actually not lurked exactly what you get, but I have certainly been told that I do not get a fitness-for-duty certificate. So I just had, in a different way, to define to myself when I'm recovered. And I am when I run my next half marathon. Then I will have to start somewhere. And the sooner I get started after all, the sooner I run a half marathon, the sooner I'm recovered.' |



1  
2  
3  
4  
5  
6  
7  
8  
9  
10  
11  
12  
13  
14  
15  
16  
17  
18  
19  
20  
21  
22  
23  
24  
25  
26  
27  
28  
29  
30  
31  
32  
33  
34  
35  
36  
37  
38  
39  
40  
41  
42  
43  
44  
45  
46  
47  
48  
49  
50  
51  
52  
53  
54  
55  
56  
57  
58  
59  
60

| Table 5 Sample statements from participants: Social activity |         |                                                                                                                                                                                                                                                                                                                                                                                                                                                                                                                                                                                   |
|--------------------------------------------------------------|---------|-----------------------------------------------------------------------------------------------------------------------------------------------------------------------------------------------------------------------------------------------------------------------------------------------------------------------------------------------------------------------------------------------------------------------------------------------------------------------------------------------------------------------------------------------------------------------------------|
| Quote                                                        | Patient | Statement                                                                                                                                                                                                                                                                                                                                                                                                                                                                                                                                                                         |
| 1                                                            | 21      | 'It's actually been more intense, I think, if one can say so. So you are together, that is, you think more about it when you are together. That's because we want to see them. It is not just that, eej, now we have to invite them, now is such and such. That's not how it is. You see these people because you want to have anything to do with them.'                                                                                                                                                                                                                         |
| 2                                                            | 25      | 'When we get together with friends, then there is a lot of talk about my illness. And that's fair enough, so now let's talk about it and then move on. I also need some input, from the outside.'                                                                                                                                                                                                                                                                                                                                                                                 |
| 3                                                            | 18      | 'Yes, I have also begun to go and watch a football match and stuff even that it's not my interest at all. But it is- to learn to get along in those large gatherings. That was enormously difficult I think. All that noise I should get used to. It is difficult when you have been just inside the house without anything. So it's something that you have to get used to, puuhh, you are just tired, right. It's crazy when you suddenly have to be social in that way, right. That was tough, I think. So I challenged myself that way.'                                      |
| 4                                                            | 2       | 'And then I was at work yesterday morning and in the afternoon I should have been to a co-worker's 60 <sup>th</sup> birthday reception. But then I just went home to take a nap and when I woke up to go out there... But then I just had to admit I needed to protect myself. So I wrote a nice little note. I have said that I would help and that meant a lot to them. But that's something I have learned. Even when something is important to others I have to prioritize because I myself have some goals and I have to feel and realize that I cannot jump to everything.' |

# BMJ Open

## Rehabilitation during intensive treatment of acute leukemia including allogeneic stem cell transplantation – a qualitative study of patient experiences

|                                 |                                                                                                                                                                                                                                                                                                                                                                                                                                                                                 |
|---------------------------------|---------------------------------------------------------------------------------------------------------------------------------------------------------------------------------------------------------------------------------------------------------------------------------------------------------------------------------------------------------------------------------------------------------------------------------------------------------------------------------|
| Journal:                        | <i>BMJ Open</i>                                                                                                                                                                                                                                                                                                                                                                                                                                                                 |
| Manuscript ID                   | bmjopen-2019-029470.R1                                                                                                                                                                                                                                                                                                                                                                                                                                                          |
| Article Type:                   | Original research                                                                                                                                                                                                                                                                                                                                                                                                                                                               |
| Date Submitted by the Author:   | 03-Oct-2019                                                                                                                                                                                                                                                                                                                                                                                                                                                                     |
| Complete List of Authors:       | Jepsen, Lene Østergaard; Odense Universitetshospital, Friis, Lone Smidstrup; Rigshospitalet, Hematology Hoybye, Mette Terp; Regionshospitalet Silkeborg, 3. Interdisciplinary Research Unit, Elective Surgery Center Marcher, Claus Werenberg; Odense Universitetshospital, Hematology Hansen, Dorte; University of Southern Denmark, National Research Centre for Cancer Rehabilitation, National Research Centre for Cancer Rehabilitation, Research Unit of General Practice |
| <b>Primary Subject Heading</b>: | Haematology (incl blood transfusion)                                                                                                                                                                                                                                                                                                                                                                                                                                            |
| Secondary Subject Heading:      | Qualitative research                                                                                                                                                                                                                                                                                                                                                                                                                                                            |
| Keywords:                       | Leukaemia < HAEMATOLOGY, REHABILITATION MEDICINE, Everyday life, QUALITATIVE RESEARCH                                                                                                                                                                                                                                                                                                                                                                                           |
|                                 |                                                                                                                                                                                                                                                                                                                                                                                                                                                                                 |

SCHOLARONE™  
Manuscripts

Manuscript 3

1  
2  
3  
4 Rehabilitation during intensive treatment of acute leukemia including allogenic stem cell  
5 transplantation – a qualitative study of patient experiences  
6

---

7  
8  
9 **Authors**

10 Lene Østergaard Jepsen, MD, PhD<sup>1</sup>

11 Lone Smidstrup Friis, MD, PhD<sup>2</sup>

12 Mette Terp Høybye, MSc, PhD<sup>3,4</sup>

13 Claus Werenberg Marcher, MD, PhD<sup>1</sup>

14 Dorte Gilså Hansen, Ass. Professor, MD, PhD<sup>5</sup>

15  
16  
17  
18  
19  
20  
21  
22  
23 **Affiliations**

- 24  
25 1. Department of Hematology, Odense University Hospital, Denmark  
26  
27 2. Department of Hematology, National University Hospital, Copenhagen, Denmark  
28  
29 3. Interdisciplinary Research Unit, Elective Surgery Center, Silkeborg Regional Hospital, Denmark  
30  
31 4. Interacting Minds Center, Department of Clinical Medicine, Aarhus University, Denmark  
32  
33 5. Research Unit of General Practice, University of Southern Denmark  
34  
35  
36  
37

38 **Correspondence**

39 Lene Østergaard Jepsen, MD, PhD

40 Odense University Hospital

41 Department of Hematology

42 Sdr. Boulevard 29

43 DK-5000 Odense C

44 Denmark

45 Tel: +45 2892 1581

46 E-mail: lene.jepsen@rsyd.dk  
47  
48  
49  
50  
51  
52  
53  
54  
55  
56  
57  
58  
59  
60

1 Manuscript 3  
2  
3

4 **Abstract**  
5

6 **Objectives**  
7

8 The diagnosis and treatment of acute leukemia affect physical, psychosocial and existential functioning.

9 Long-lasting treatment periods with impaired immune system, hygienic and social restrictions challenge  
10 patient well-being and rehabilitation as compared to other individuals with cancer. This study elucidates how  
11 acute leukemia patients, treated with curative intent in an outpatient setting, assess their physical,  
12 psychosocial and existential capability during and following treatment, and furthermore reports on the health  
13 initiatives offered to support their rehabilitation.  
14  
15  
16  
17  
18  
19  
20  
21

22 **Design, setting, participants and interventions**  
23

24 We conducted qualitative, semi-structured individual interviews with 16 acute leukemia patients, six months  
25 after end of treatment in the patients' homes. This was the final interview, in a line of three, carried out as  
26 part of a larger qualitative study.  
27  
28  
29  
30

31 **Results**  
32

33 The data was analyzed thematically through an inductive ongoing process consisting of four steps, resulting  
34 in the following three categories: physical activity, mental well-being and social activity. None of the  
35 patients were satisfied with their physical capability at the time of interview and experienced substantial  
36 impairment of functional capabilities. All patients struggled with anxiety and expressed a need for  
37 continuous progress in treatment and well-being to be feeling safe. It took an unexpected large effort to  
38 regain a meaningful social life, and patients still had to prioritize activities.  
39  
40  
41  
42  
43  
44  
45  
46

47 **Conclusions**  
48

49 Acute leukemia patients suffered physically, psychologically and existentially throughout their illness  
50 trajectory. Rehabilitation initiatives deriving from the health care system and municipalities held room for  
51 improvement. Future programs should pay attention to the contextual changes of treatment of this patient  
52 group and individuals' changing needs and motivation of physical exercise.  
53  
54  
55  
56  
57  
58  
59  
60

Manuscript 3

## Summary

### Strength and limitations of the study

- A relatively small number of participants may challenge generalization to the wider population of individuals with hematological cancer
- The patients showed a high degree of self-preservation instinct during the illness trajectory, which may indicate a selection bias
- The theoretical framework of rehabilitation may strengthen the possibility of analytical generalization

### Funding

This work was supported by the University of Southern Denmark, DKK 400.000, the Region of Southern Denmark, DKK 500.000, The Danish Cancer Society, DKK 465.000, the Anders Hasselbalch Foundation, DKK 20.000, the Family Hede Nielsen Foundation, DKK 25.000 and the joint research pool between National University Hospital and Odense University Hospital supporting the highly-specialized functions, DKK 40.000. The National Research Center of Cancer Rehabilitation, University of Southern Denmark is partly funded by the Danish Cancer Society.

### Conflicts of interest

The authors declare that they have no conflicts of interest.

### Author contribution

LØJ participated in the design of the study, carried out the interviews, analyzed data and drafted the manuscript. LF participated in the design of the study and in the discussion of the analysis and the results. She also critically revised the manuscript. CM participated in the discussion of the analysis and the results. He also critically revised the manuscript. MH participated in the design of the study and in the discussion of the analysis and the results. She also critically revised the manuscript. DH participated in the design of the study and in the discussion of the analysis and the results. She also critically revised the manuscript. All authors read and approved the final manuscript.

1 Manuscript 3  
2  
3

4 **Patient consent form**

5 Written informed consent for publication of their transcribed interviews was obtained from the patients and  
6  
7 their spouses. A copy of the consent form is available for review by the Editor of this journal.  
8  
9

10  
11 **Data sharing**

12 The dataset generated and analyzed during the current study is not publicly available because it contains  
13  
14 information that could compromise research participant privacy, but is available from the corresponding  
15  
16 author on reasonable request.  
17  
18

19  
20 **Keywords**

21 Rehabilitation, acute leukemia, everyday life, qualitative study  
22  
23  
24  
25  
26  
27  
28  
29  
30  
31  
32  
33  
34  
35  
36  
37  
38  
39  
40  
41  
42  
43  
44  
45  
46  
47  
48  
49  
50  
51  
52  
53  
54  
55  
56  
57  
58  
59  
60

## Manuscript 3

**Introduction**

Patients with acute leukemia (AL) undergo extraordinary long periods of intensive treatment with high susceptibility to sudden and dramatic changes in their health condition and prognosis [1]. Impairment of the immune system necessitates substantial hygienic and social restrictions. However, during the last decade, a paradigm shift in the treatment of these severely immune insufficient patients has occurred. The patients who were formerly isolated at the hospital during their highly intensive treatment are now managed in the outpatient setting while concurrently living at home. Rehabilitation needs of the patients and rehabilitation offers by the health care system are challenged by these organizational changes. However, little clinical or research attention has been paid to rehabilitation and survivorship care for this specific group of immune insufficient individuals with hematological cancer managed in an outpatient setting.

In this paper, the concept of rehabilitation refers to specific initiatives and efforts by health professionals but is also an analytical concept for describing the process in which the patients reframe a sense of self [2].

The existing knowledge underlines beneficial effects of rehabilitation to individuals with cancer. From a few studies, we know that physical exercise is feasible and safe for AL inpatients, even those with critical cytopenia. Beneficial effects on physical performance, fatigue and quality of life have been shown [3-9]. As an example, supervised exercise and health counseling intervention for patients with AL during outpatient management showed physical, functional, psychosocial, and symptom benefits [8]. Patients undergoing allogenic hematopoietic stem cell transplantation (HSCT) due to hematological malignancies have also shown significant benefit from exercise interventions without reports of negative effects [9].

Health-related quality of life of individuals with hematological cancer is lowered mainly due to reduced role functioning, insomnia and fatigue [10,11]. Unmet needs of rehabilitation are strongly associated with impaired quality of life for individuals with cancer in general [12]. Psychological counseling, physical rehabilitation, sexual and financial support and practical help have been found to be important, but needs vary with age, sex and cancer diagnosis [13,14].

## Manuscript 3

1  
2  
3  
4 Summing up, the existing knowledge underlines the beneficial effects of rehabilitation to patients with AL.  
5  
6 However, the rapid changes of treatment setting, patient population and lack of knowledge of existing  
7  
8 evidence may leave patients with unmet needs and functional impairment. Knowledge about patients'  
9  
10 experiences and expectations from the very special context of outpatient management may have the potential  
11  
12 to improve well-being of an increasing and still older group of intensively treated patients.  
13  
14

15 Based on patient interviews this paper elucidates how patients with AL treated with curative aim assess their  
16  
17 physical, psychosocial and existential capability during and following treatment and health initiatives  
18  
19 supporting their rehabilitation.  
20  
21

**Material and methods****Design**

22  
23  
24  
25  
26  
27 The material derives from individual, semi-structured interviews with 16 patients, six months after end of  
28  
29 treatment. This type of interview was deemed suitable to access and explore patient experience in an open  
30  
31 manner to allow for patients to add their own perspectives to the interviewer's agenda. These interviews  
32  
33 were the third and final interview, conducted as part of a larger qualitative study with the overall aim of  
34  
35 exploring the outpatient setting as a context of intensive cancer treatment [15,16]. We combined participant  
36  
37 observation in the outpatient setting (OPS), individual patient interviews, and group or individual interviews  
38  
39 with their relatives. Patients were consecutively invited by and gave consent to the first author, LØJ, who  
40  
41 conducted the interviews. LØJ presented herself as a PhD student and young medical doctor with previous  
42  
43 experience in the department.  
44  
45

46  
47 Semi-structured interviews were conducted based on a thematic interview guide [15]. The first topic was  
48  
49 'impact on everyday life practices' where rehabilitation issues were addressed by questions such as 'Try to  
50  
51 describe your present physical capability and how you reached that level'. The question was repeated for  
52  
53 psychosocial and existential well-being. There was one main question to each topic, and depending on the  
54  
55 patient's answers, three to eighteen additional questions to facilitate a talk covering the topic sufficiently.  
56  
57  
58  
59  
60



## Manuscript 3

The second topic, ‘the home’, explored daily life at home and the roles of the family, whereas the third topic ‘hygiene’ addressed the impact of intense hygiene requirements.

### Patient and Public involvement

Patients were not involved in the research design.

### Participants and interviews

Participants were Danish speaking patients with AL intensively treated with a curative aim. All were managed in the OPS, ‘the Home Unit’ at the Department of Hematology, Odense University Hospital (OUH) and subsequently followed in the outpatient clinic at OUH or at the National University Hospital, Copenhagen or at Aarhus University Hospital if allogeneically transplanted [15].

Twenty-six patients were included from May 2013 to August 2014, and out of this group, 16 took part in this third interview, six months after end of treatment (Figure 1). Table 1 shows the demographic and clinical characteristics.

| Table 1 Demographic and clinical characteristics of study participants (n=16) |                            |
|-------------------------------------------------------------------------------|----------------------------|
| Sample characteristics, third interview                                       | Description                |
| Gender                                                                        |                            |
| • Male                                                                        | 9 (56 %)                   |
| • Female                                                                      | 7 (44 %)                   |
| Age (years)                                                                   | Mean 55.1; range up to 75) |
| • < 60                                                                        | 8 (50 %)                   |
| • ≥ 60                                                                        | 8 (50 %)                   |
| Marital status                                                                |                            |
| • Married or common-law relationship                                          | 13 (81 %)                  |
| • Single/divorced                                                             | 3 (19 %)                   |
| Education                                                                     |                            |
| • Unskilled workers                                                           | 2 (12 %)                   |
| • Skilled workers                                                             | 10 (63 %)                  |

## Manuscript 3

|                                                                                                                                                                                                                                                                       |                        |
|-----------------------------------------------------------------------------------------------------------------------------------------------------------------------------------------------------------------------------------------------------------------------|------------------------|
| <ul style="list-style-type: none"> <li>• Further education</li> </ul>                                                                                                                                                                                                 | 4 (25 %)               |
| Diagnosis*                                                                                                                                                                                                                                                            |                        |
| <ul style="list-style-type: none"> <li>• Acute myeloid leukemia (AML)</li> </ul>                                                                                                                                                                                      | 11 (69 %) (3 relapse)  |
| <ul style="list-style-type: none"> <li>• Chronic myeloid leukemia in myeloid blast crisis (CML)</li> </ul>                                                                                                                                                            | 1 (6 %)                |
| <ul style="list-style-type: none"> <li>• Chronic myelomonocytic leukemia (CMML)</li> </ul>                                                                                                                                                                            | 1 (6 %)                |
| <ul style="list-style-type: none"> <li>• Refractory anemia with excess blasts (RAEB)</li> </ul>                                                                                                                                                                       | 1 (6 %)                |
| <ul style="list-style-type: none"> <li>• Acute lymphoblastic leukemia (ALL)</li> </ul>                                                                                                                                                                                | 2 (13 %)               |
| Time from diagnosis to third interview (weeks)                                                                                                                                                                                                                        | Mean 51.9; range 40-72 |
| Treatment status                                                                                                                                                                                                                                                      |                        |
| <ul style="list-style-type: none"> <li>• Outpatient Clinic follow-up, Odense University Hospital</li> </ul>                                                                                                                                                           | 3 (19 %)               |
| <ul style="list-style-type: none"> <li>• Allogenic hematopoietic stem cell transplantation, National University Hospital, Copenhagen or Aarhus University Hospital</li> </ul>                                                                                         | 10 (62 %)              |
| <ul style="list-style-type: none"> <li>• Second line therapy, Odense University Hospital</li> </ul>                                                                                                                                                                   | 3 (19 %)               |
| <p>The CML, CMML and RAEB special leukemia diagnoses, which are chronic diseases, but often turn into acute leukemia after a short time. Therefore, they received treatment equivalent to acute leukemia patients' regimens and were handled identically to them.</p> |                        |

The interviews were conducted in the patients' home and lasted from 40 to 115 minutes (mean 68 minutes).

All interviews were digitally recorded.

### Context for rehabilitation

Rehabilitation has previously been understood as a practice related to the post-treatment life of patients, but the facilities and practices of the hospital during in and outpatient management may be considered a context of rehabilitation of patients with AL. In addition, non-hospital settings may be part of the rehabilitation.

The course of treatment for newly diagnosed patients with AL who are candidates for curative intended chemotherapy contains both in and outpatient periods. The latter where the patients, during periods with severe hematological cytopenia, stay at home and appear at follow-up visits every second day [15].

## Manuscript 3

1  
2  
3  
4 The OPS was situated next to the hematological department, OUH, where all the patients could use the  
5  
6 fitness facilities located there. A physiotherapist was present twice a week to instruct the patients.  
7  
8

9 Before receiving the transplant, patients were instructed in some simple exercises by a physiotherapist.  
10  
11 Furthermore, all patients had an exercise-bike in their bed-room during periods of isolation at the hospital.  
12  
13

14 In addition to physical exercise, patients could, at any time, ask for a referral for individual advice by a  
15  
16 physiotherapist, a psychologist, a chaplain or a medical social worker at the department. Furthermore,  
17  
18 psychologists from The Danish Cancer Society were available to patients and relatives in facilities at the  
19  
20 hospital.  
21  
22

23 In Denmark, the overall responsibility of rehabilitation is located at the local municipality level (98  
24  
25 municipalities/5.6 million inhabitants). Due to different demographics, staff and geography of the  
26  
27 municipalities, patients meet different offers and knowledge about their disease [17].  
28  
29

### 30 **Theoretical framework and analysis**

31  
32 The study was based on the World Health Organization (WHO) definition of rehabilitation [18], but  
33  
34 simultaneously acknowledged that rehabilitation formed an analytical approach to the physical, psychosocial  
35  
36 and existential challenges facing the patients with AL, and was not a structural or organizational intervention  
37  
38 as such. This paper aims to study the configuration of rehabilitation needs as experienced by patients with  
39  
40 AL and to draw attention to possible contextual factors that should be taken into account in future programs.  
41  
42 To further support our analytical exploration, the theoretical framework included International Classification  
43  
44 of Functioning, Disability and Health (ICF) pointing out the dynamic interaction of health condition, body  
45  
46 function and structure, activity, participation, and personal as well as environmental factors [19].  
47  
48  
49

50 The data were analyzed thematically through an inductive ongoing process of four steps inspired by Miles  
51  
52 and Huberman [20]. First, the interviews were transcribed by a secretary and read several times by LØJ to  
53  
54 gain an overall understanding of the material. Secondly, specific paragraphs were identified as the content  
55  
56 and context related to each other and the study aim. Thirdly, descriptive codes were produced and assigned.  
57  
58  
59  
60

## Manuscript 3

1  
2  
3  
4 Finally, the text was condensed into categories. The group of authors discussed the contents and  
5  
6 interpretation of data throughout the process.  
7  
8

**Ethics**

9  
10  
11 Informed consent was obtained from all individual study participants. The study was approved by The  
12  
13 Regional Scientific Ethical Committees for Southern Denmark (S-20122000 86), the Danish Data Protection  
14  
15 Agency (J. no. 2008-58-0035) and the Department of Hematology, OUH. The first author had no  
16  
17 professional medical interaction with the participants during the study period. We carefully recognize that  
18  
19 participation in research while undergoing treatment for a serious illness puts strain on patients.  
20  
21  
22

**Results**

23  
24 Patients did not use the word ‘rehabilitation’ about the process of regaining physical, mental and social  
25  
26 functioning. Rehabilitation was therefore an analytical condensation of the AL patients’ assessments of their  
27  
28 capability and experiences of supportive initiatives. Subcategories of physical activity, mental well-being  
29  
30 and social activity were constructed and will be described separately in the following, although strongly  
31  
32 interrelated as conceptualized by WHO and in the ICF-model [19]. Existential reflections and challenges  
33  
34 emerged during interviews.  
35  
36  
37

38 Reorganization of the everyday life practices was a first step for many of the patients. This process began  
39  
40 when being discharged from hospital the first time and continued after end of treatment. They described how  
41  
42 they had lacked the energy to participate in a full day’s program, and for example had escalated activities  
43  
44 from twice a week to every second day and from one to five hours. Their pace was still slow through all  
45  
46 activities, and a nap in the afternoon was often needed. They preferred projects without a deadline (Table 2,  
47  
48 quote 1).  
49  
50  
51

| Table 2 Sample statements from participants |         |                                                                                                                                                                                                   |
|---------------------------------------------|---------|---------------------------------------------------------------------------------------------------------------------------------------------------------------------------------------------------|
| Quote                                       | Patient | Statement                                                                                                                                                                                         |
| 1                                           | 25      | ‘If I have to do something that is physically demanding, it will have to be something that I can go to and from. Otherwise I will not begin because I know that I will not be able to finish it.’ |

## Manuscript 3

Limited house-keeping tasks, such as cutting the grass or vacuuming the house which would have posed no problem prior to the onset of illness were now ‘physically demanding’. This challenged them substantially and greatly impacted their daily lives and psychosocial well-being. They had expected this during treatment, but six months after end of treatment, the patients had expected to be ‘back to normal’.

**Physical activity**

Nearly all patients reported that they went for walks, but the intensity, the distance and how often varied between patients and times during the illness trajectory. Some patients with neuropathy in the feet could only walk brief distances, whereas others walked for 1½ hour. The simple exercises, including the use of elastic exercise bands, as instructed at OUH were used by many patients (Table 3, quote 1).

Table 3 Sample statements from participants: Physical activity

| Quote | Patient | Statement                                                                                                                                                                                                                                                                                                                                                                 |
|-------|---------|---------------------------------------------------------------------------------------------------------------------------------------------------------------------------------------------------------------------------------------------------------------------------------------------------------------------------------------------------------------------------|
| 1     | 10      | ‘I’ve only made those exercises and I feel a little – guilty about it because they said, You should just [walk] half an hour round the neighborhood. [] I’m a little afraid to fall. The energy level is also crucial. But now for example to day I would be able to do it. I would be able to walk half an hour. But then tomorrow maybe I’m just as limp as a dishrag.’ |
| 2     | 23      | ‘For me, who comes with muscles, which are nor destroyed or cut in but just slack after lying in a bed – the training [arranged by the municipality] is worth nothing.’                                                                                                                                                                                                   |
| 3     | 18      | ‘So I was active. [] But I also think I had constantly in my mind – if it – my leukemia comes back, I’ll fucking be in good shape, right.’                                                                                                                                                                                                                                |

Referral from the hospital to the municipality for rehabilitation services was not systematic. The service offered by the municipalities comprised group training with other types of patients, one hour twice a week for six to twelve weeks. All the participants of this study experienced being the only patient with AL/HSCT. By the end of the course of training many were told that they performed too well to continue in the group. The patients described a lack of enthusiasm and competences by the health care professionals in the municipalities (Table 3, quote 2).

## Manuscript 3

After concluding chemotherapy, a handful of patients exercised more intensively in a fitness center; did bike rides of 50 kilometers, swims of 1000 meters or three to four kilometers of running. They wanted to regain their usual physical strength and fitness but also aimed to be prepared if the AL relapsed (Table 3, quote 3).

None of the patients were satisfied with their physical status six months after the end of treatment or with being less capable than expected. In hindsight they reflected that it had been too easy to ‘escape’ the physiotherapist during hospitalization. They did not remember having been encouraged to be physically active when referred to the OPS. In the first interviews [15] the patients described how they prioritized socializing with fellow patients in the OPS to the detriment of physical training. Still, they did not participate in organized training but were more active through all the unnoticed activities at home, such as doing the laundry, the dishes or walking the stairs [15]. However, activities that were part of their everyday life were not perceived by patients as exercise.

The outcome of training programs offered by the municipality was experienced by the patients as low, and they often performed too well to continue the program. Being evaluated in this way seemed counterproductive to their motivation to continue training and produced dissatisfaction with their own physical capability at the time of the last interview. The lack of physical capability still prevented the patients from engaging in everyday life activities as they used to and wanted to.

### Mental well-being

The treatment and the physical capability strongly influenced the mental well-being of the patients. When not feeling better or when physical symptoms caused uncertainty the patients felt challenged (Table 4, quote 1).

Table 4 Sample statements from participants: Mental well-being

| Quote | Patient | Statement                                                                                                                                                                                                                                                                                                                                                                                       |
|-------|---------|-------------------------------------------------------------------------------------------------------------------------------------------------------------------------------------------------------------------------------------------------------------------------------------------------------------------------------------------------------------------------------------------------|
| 1     | 19      | ‘But I think psychologically or mentally we are pretty strong. That’s not a problem, right. That I can recognize clearly. The only time I got a knock, right, was when the one kidney stopped working. There I thought damn, what is brewing now. Because it was like, it is after all a serious matter, right and it is obviously clear that it had to do with everything else – in some weird |

## Manuscript 3

|   |    |                                                                                                                                                                                                                                                                                                                                                                                                                           |
|---|----|---------------------------------------------------------------------------------------------------------------------------------------------------------------------------------------------------------------------------------------------------------------------------------------------------------------------------------------------------------------------------------------------------------------------------|
|   |    | way.'                                                                                                                                                                                                                                                                                                                                                                                                                     |
| 2 | 23 | 'Principally you are a lot because of you training and the background you have and what you do.'                                                                                                                                                                                                                                                                                                                          |
| 3 | 25 | 'Your status gets chronic. I have actually not spotted exactly what you get, but I have certainly been told that I do not get a fit-for-duty certificate. So I just had, in a different way, to define to myself when I'm recovered. And I am when I run my next half marathon. Then I will have to start somewhere. And the sooner I get started after all, the sooner I run a half marathon, the sooner I'm recovered.' |

Anxiety was always present but seldom shown, patients reported. Small things like a spot on the skin initiated a flow of thoughts: graft versus host disease – AL relapse – death. One way to avoid these thoughts was to be occupied with practical tasks and another way was to talk to family members or friends. All patients used these coping strategies to a varying extent, and furthermore they talked to fellow-patients, when meeting in the OPS.

AL had challenged their invulnerability and sense of self, which was usually shaped by work or social activities. Therefore, many patients raised the existential question: 'Who am I – besides being a leukemia patient?' (Table 4, quote 2). Patients had perceived that being cured was the end of the illness trajectory. The stepwise prolongation experienced by everyone was psychologically draining. Furthermore, it was hard never to be given a 'cured-date'. As an alternative some patients made their own goals for when to view themselves as cured (Table 4, quote 3).

Few patients had consulted a psychologist during the illness trajectory. The majority experienced no need to, especially not in the beginning when survival and physical issues had priority. Later, it was a barrier to seek counseling knowing they would have to describe their illness trajectory once again.

Mental well-being was influenced by flow in treatment and physical capability. Most patients addressed the mental challenges by talking to family and friends, which was also reflected by the fact that few patients had contacted a psychologist.

## Manuscript 3

**Social activity**

As previously described the social life of patients suffered while being inpatients, while outpatient management allowed for more time spent together with fellow patients. This type of community became an important and highly valued part of their social life [15].

The difference between friends and acquaintances became more apparent as time went by. Losing contact with persons previously counted as friends was a mental strain (Table 5, quote 1).

Table 5 Sample statements from participants: Social activity

| Quote | Patient | Statement                                                                                                                                                                                                                                                                                                                                                                                                                                                                                                                                                                         |
|-------|---------|-----------------------------------------------------------------------------------------------------------------------------------------------------------------------------------------------------------------------------------------------------------------------------------------------------------------------------------------------------------------------------------------------------------------------------------------------------------------------------------------------------------------------------------------------------------------------------------|
| 1     | 21      | 'It's actually been more intense, I think, if one can say so. So you are together, that is, you think more about it when you are together. That's because we want to see them. It is not just that, argh, now we have to invite them, now is such and such. That's not how it is. You see these people because you want to have something to do with them.'                                                                                                                                                                                                                       |
| 2     | 25      | 'When we get together with friends, then there is a lot of talk about my illness. And that's fair enough, so now let's talk about it and then move on. I also need some input, from the outside.'                                                                                                                                                                                                                                                                                                                                                                                 |
| 3     | 18      | 'Yes, I have also begun to go and watch a football match and stuff even though that it's not my interest at all. But it is- to learn to get along in those large gatherings. That was enormously difficult I think. All that noise I had to get used to. It is difficult when you have been just inside the house without anything. So it's something that you have to get used to, yikes, you are just tired, right. It's crazy when you suddenly have to be social in that way, right. That was tough, I think. So I challenged myself that way.'                               |
| 4     | 2       | 'And then I was at work yesterday morning and in the afternoon I should have been at a co-worker's 60 <sup>th</sup> birthday reception. But then I just went home to take a nap and when I woke up to go out there... But then I just had to admit I needed to protect myself. So I wrote a nice little note. I have said that I would help and that meant a lot to them. But that's something I have learned. Even when something is important to others I have to prioritize because I myself have some goals and I have to feel and realize that I cannot jump to everything.' |



## Manuscript 3

1  
2  
3  
4 As the trajectory proceeded patients wanted the conversation to turn away from illness and treatment on to  
5  
6 everyday things and the future (Table 5, quote 2).  
7  
8

9 The treatment precautions during periods with severe hematological neutropenia meant that patients only  
10  
11 saw a few people at a time and that nearly all social activity took place at home or at the hospital. Returning  
12  
13 to a more regular social life after end of treatment was overwhelming and unexpectedly demanding (Table 5,  
14  
15 quote 3).  
16  
17

18 Six months after end of treatment the energy level of patients was still impaired. Patients thus had to choose  
19  
20 for themselves what to participate in, and social activities were in competition with practical tasks, physical  
21  
22 activity and work (Table 5, quote 4).  
23  
24

25 The patients described how it was unexpectedly demanding to regain a meaningful social life. None of the  
26  
27 patients experienced or expected that social life had the attention of professional intervention.  
28  
29  
30  
31

**Discussion**

32 Six months after the end of treatment patients with AL were dissatisfied with their physical, psychological  
33  
34 and social capability. The rehabilitation support during all phases of treatment including HSCT and the  
35  
36 following phase of recovery were experienced as non-existing, minimal or inadequate.  
37  
38  
39

40 Our results from the interviews conducted during earlier treatment phases showed that maintaining everyday  
41  
42 life was highly prioritized by patients as well as spouses [15,16]. In line with that, patients reported that they  
43  
44 did not exercise as much as they wanted to. In contrast with the evidence, a long hematological tradition of  
45  
46 avoiding physical training during periods of cytopenia may still be in practice [8,21]. Patients did not recall  
47  
48 professionals' attention to physical activity during the course of treatment. At the same time they describe  
49  
50 having refused the physiotherapist's training offer and prioritized the social engagement while at the OPS  
51  
52 [15]. Less contact with healthcare professionals during outpatient management may be another important  
53  
54 barrier. Our third interview thereby adds that the patients' attitude towards training changed substantially  
55  
56 from having no motivation to feeling highly motivated after end of treatment. According to the patients the  
57  
58  
59  
60

## Manuscript 3

1  
2  
3  
4 municipalities did not offer training courses matching these needs – at that time. Some patients were  
5  
6 informed that they were performing too well to participate. Perhaps because they did not suffer from any  
7  
8 specific disability but were very generally weakened. The termination of the training course contrasted their  
9  
10 own perception of lacking physical capabilities to participate in everyday activities. Individual needs  
11  
12 assessment based on the ICF-model including ‘activity’ and ‘participation’ could assist future patients and  
13  
14 responsible practitioners to better understand patients’ functional level and motivation [19].  
15  
16

17  
18 It is relevant to consider that there is a difference between the patients’ attitudes and concrete actions  
19  
20 regarding physical training during treatment. In the late modern society, patients are expected to take  
21  
22 individual responsibility for their own health and health behavior – such as physical exercise, healthy food  
23  
24 and so on [22]. It may be experienced as stigmatizing to the patients not to satisfy such expectations. This  
25  
26 could, as a context for blaming the health care system for a lack of attention, be moving the responsibility  
27  
28 away from the self and to the system [22,23].  
29  
30

31  
32 In line with the dynamic of the ICF-model the treatment and the physical capability strongly influenced the  
33  
34 mental well-being of the patients and vice versa [19]. Few patients called for easier access to psychologists  
35  
36 but the majority found no need since they experienced support from family, friends and other health care  
37  
38 professionals. This is in line with a questionnaire study among 132 mixed hematological and oncological  
39  
40 patients [24]. Internationally, systematic needs assessment has been recommended as part of routine cancer  
41  
42 care to uncover substantial needs for professional support that would otherwise not be addressed [18].  
43

44  
45 However, none of the patients in our study have had such a consultation. Another explanation to the sparse  
46  
47 demand for psychological support may be that the weakest patients declined to participate in the study, had  
48  
49 left, or that demanding existential problems surface later.

50  
51 The patients had to prioritize caring for themselves even though it sometimes caused emotional limbo, as  
52  
53 described in a previous focus group interview study of mixed individuals with cancer [25]. Social  
54  
55 reintegration unexpectedly required an effort, and they had to challenge themselves step-by-step. None  
56  
57 seemed to expect professional help and no one stated that they should have been warned of the social  
58  
59  
60

## Manuscript 3

1  
2  
3  
4 challenges. This gives the impression that the patients made no connection between their social life and the  
5 possibility of professional support, e.g. as part of rehabilitation in line with the definition [18] and ICF-model  
6  
7 [19].  
8  
9

**Strength and limitations**

10  
11  
12  
13 The study design with a relatively small number of participants hampers generalization to the wider  
14 population of individuals with hematological cancer. The majority of patients received a HSCT as the final  
15 treatment entity, and we were not able to differentiate our analysis in this regard. The patients showed a high  
16 degree of self-preservation instinct during the illness trajectory, which may indicate a selection bias.  
17  
18 However, the theoretical framework of rehabilitation may strengthen the possibility of analytical  
19 generalization. Using the dynamic ICF-model as basis of the data analysis, the focus was on physical,  
20 psychological and social functioning of the body, activity and participation together with health-related and  
21 environmental factors. In a rehabilitation perspective of this specific group of individuals with cancer, six  
22 months after intensive treatment seems a short time. Additional data after one year or longer may show other  
23 aspects and perspectives on for example, late mental or existential problems that cause other needs for  
24 rehabilitation.  
25  
26  
27  
28  
29  
30  
31  
32  
33  
34  
35  
36  
37  
38

**Perspectives**

39  
40 This study has several implications for future patients. The patients wanted the rehabilitation process to  
41 begin shortly after the start of treatment. This is in line with all rehabilitation recommendations [19,18] and  
42 highlights the need for focus on maintaining instead of catching up lost capabilities.  
43  
44  
45  
46

47 The need for continuous motivation by health care professionals was underlined. Patients' understanding of  
48 and focus on the importance of physical activity for future performance are important, especially on days  
49 with exhausting symptoms or bad mood. Even minor everyday activities like the change of linen counter loss  
50 of muscle and impaired physical capability [8]. Simple exercises could be introduced shortly after the start of  
51 treatment and be supervised through treatment including the OPS. Perhaps it is possible to couple these with  
52  
53  
54  
55  
56  
57  
58  
59  
60

## Manuscript 3

1  
2  
3  
4 social engagement with fellow patients. This may support continuity and activities across different hospitals,  
5  
6 home and municipality initiatives improving well-being and quality of life among patients.  
7

8  
9 Psychological counseling may support some patients, but health care professionals should be aware of  
10  
11 patient barriers rising from the need to ‘tell their story’ once more.  
12

13  
14 A review of the evidence for the treatment-initiated precautions can lead to improved patients’ participation  
15  
16 in role functioning, family- and social life. Furthermore this study suggests timely preparation of patient and  
17  
18 family members for them to understand that regaining a normal social life after end of treatment will be  
19  
20 another demanding phase.  
21  
22

**Conclusion**

23  
24  
25  
26 In conclusion, the findings of this study contribute to our understanding of how outpatients with AL treated  
27  
28 with curative intension, including HSCT, experience rehabilitation up to six months after end of treatment.  
29

30  
31 None of the patients were satisfied with their physical capability six months after end of treatment. They  
32  
33 managed to be physically active through daily tasks and had not experienced being offered an exercise  
34  
35 program matching their needs at the end of treatment when their motivation for being physically active arose.  
36

37  
38 Psychologically the patients struggled with anxiety with regards to infections or relapse, and their perceived  
39  
40 needs for progress in the treatment and in everyday functioning to feel well. Talking to family and friends  
41  
42 was experienced as a good way of addressing psychological challenges. The precautions stipulated by the  
43  
44 hospitals restricted social life and it unexpectedly demanded an effort by the patients to regain a meaningful  
45  
46 social life.  
47

48  
49 Room for improvement of rehabilitation initiatives, from both the health care system and the municipalities,  
50  
51 has been identified. Regular needs assessment should be used to understand changes in health and motivation  
52  
53 during the illness trajectory. Health care professionals should remember that six months after end of  
54  
55 treatment is too early to expect full recovery of many everyday basic skills. For the benefit of the patients,  
56  
57 information about the rehabilitation process can be given up front, but must be addressed continuously.  
58  
59  
60

## Manuscript 3

Figure 1: Enrollment of patients

**Acknowledgements**

The authors wish to thank all the patients who participated in the study for their valuable contributions during a difficult period of their lives. This study was funded by the University of Southern Denmark, the Region of Southern Denmark, The Danish Cancer Society, the Anders Hasselbalch Foundation, the Family Hede Nielsen Foundation and the joint research pool between National University Hospital and Odense University Hospital supporting the highly-specialized functions. The National Research Center of Cancer Rehabilitation, University of Southern Denmark is partly funded by the Danish Cancer Society.

**References**

1. Walter RB, Taylor LR, Gardner KM, Dorcy KS, Vaughn JE, Estey EH (2013) Outpatient management following intensive induction or salvage chemotherapy for acute myeloid leukemia. *Clin Adv Hematol Oncol* 11 (9):571-577
2. Messenger SD (2010) Getting past the accident: explosive devices, limb loss, and refashioning a life in a military medical center. *Med Anthropol Q* 24 (3):281-303
3. Elter T, Stipanov M, Heuser E, von Bergwelt-Baildon M, Bloch W, Hallek M, Baumann F (2009) Is physical exercise possible in patients with critical cytopenia undergoing intensive chemotherapy for acute leukaemia or aggressive lymphoma? *Int J Hematol* 90 (2):199-204. doi:10.1007/s12185-009-0376-4
4. Dimeo F, Schwartz S, Fietz T, Wanjura T, Boning D, Thiel E (2003) Effects of endurance training on the physical performance of patients with hematological malignancies during chemotherapy. *Support Care Cancer* 11 (10):623-628. doi:10.1007/s00520-003-0512-2
5. Battaglini CL, Hackney AC, Garcia R, Groff D, Evans E, Shea T (2009) The effects of an exercise program in leukemia patients. *Integr Cancer Ther* 8 (2):130-138. doi:10.1177/1534735409334266
6. Alibhai SM, O'Neill S, Fisher-Schlombs K, Breunis H, Brandwein JM, Timilshina N, Tomlinson GA, Klepin HD, Culos-Reed SN (2012) A clinical trial of supervised exercise for adult inpatients with acute myeloid leukemia (AML) undergoing induction chemotherapy. *Leuk Res* 36 (10):1255-1261. doi:10.1016/j.leukres.2012.05.016
7. Alibhai SM, Durbano S, Breunis H, Brandwein JM, Timilshina N, Tomlinson GA, Oh PI, Culos-Reed SN (2015) A phase II exercise randomized controlled trial for patients with acute myeloid leukemia undergoing induction chemotherapy. *Leuk Res*. doi:10.1016/j.leukres.2015.08.012
8. Jarden M, Adamsen L, Kjeldsen L, Birgens H, Tolver A, Christensen JF, Stensen M, Sorensen VA, Moller T (2013) The emerging role of exercise and health counseling in patients with acute leukemia undergoing chemotherapy during outpatient management. *Leuk Res* 37 (2):155-161. doi:10.1016/j.leukres.2012.09.001
9. Wiskemann J, Huber G (2008) Physical exercise as adjuvant therapy for patients undergoing hematopoietic stem cell transplantation. *Bone Marrow Transplant* 41 (4):321-329. doi:10.1038/sj.bmt.1705917
10. Johnsen AT, Tholstrup D, Petersen MA, Pedersen L, Groenvold M (2009) Health related quality of life in a nationally representative sample of haematological patients. *Eur J Haematol* 83 (2):139-148. doi:10.1111/j.1600-0609.2009.01250.x
11. Hoybye MT, Dalton SO, Christensen J, Larsen LR, Kuhn KG, Jensen JN, Carlsen K, Johansen C (2008) Research in Danish cancer rehabilitation: social characteristics and late effects of cancer among participants in the FOCARE research project. *Acta Oncol* 47 (1):47-55. doi:10.1080/02841860701418846

## Manuscript 3

12. Hansen DG, Larsen PV, Holm LV, Rottmann N, Bergholdt SH, Sondergaard J (2013) Association between unmet needs and quality of life of cancer patients: a population-based study. *Acta Oncol* 52 (2):391-399. doi:10.3109/0284186x.2012.742204
13. Veloso AG, Sperling C, Holm LV, Nicolaisen A, Rottmann N, Thayssen S, Christensen RD, Lehmann Knudsen J, Hansen DG (2013) Unmet needs in cancer rehabilitation during the early cancer trajectory--a nationwide patient survey. *Acta Oncol* 52 (2):372-381. doi:10.3109/0284186x.2012.745648
14. Holm LV, Hansen DG, Johansen C, Vedsted P, Larsen PV, Kragstrup J, Sondergaard J (2012) Participation in cancer rehabilitation and unmet needs: a population-based cohort study. *Support Care Cancer* 20 (11):2913-2924. doi:10.1007/s00520-012-1420-0
15. Jepsen LO, Hoybye MT, Hansen DG, Marcher CW, Friis LS (2015) Outpatient management of intensively treated acute leukemia patients-the patients' perspective. *Support Care Cancer*. doi:10.1007/s00520-015-3012-2
16. Jepsen LØ, Friis LS, Hansen DG, Marcher CW, Høybye MT (2019) Living with outpatient management as spouse to intensively treated acute leukemia patients. *PLOS ONE* 14(5): e0216821. doi: 10.1371/journal.pone.0216821
17. Kristiansen M, Adamsen L, Brinkmann FK, Krasnik A, Hendriksen C (2015) Need for strengthened focus on cancer rehabilitation in Danish municipalities. *Dan Med J* 62 (4):A5045
18. World Health Organization - Rehabilitation (2015).
19. World Health Organization - International Classification of Functioning, Disability and Health (ICF) (2001).
20. Miles MB, Huberman AM, Saldaña J (2014) *Qualitative data analysis : a methods sourcebook*. 3 edn. Sage, Thousand Oaks, CA
21. Midtgaard J, Baadsgaard MT, Moller T, Rasmussen B, Quist M, Andersen C, Rorth M, Adamsen L (2009) Self-reported physical activity behaviour; exercise motivation and information among Danish adult cancer patients undergoing chemotherapy. *Eur J Oncol Nurs* 13 (2):116-121. doi:10.1016/j.ejon.2009.01.006
22. Lupton D (1997) Consumerism, reflexivity and the medical encounter. *Soc Sci Med* 45 (3):373-381
23. Parsons T (1970) *The social system*. Reprinted edn. Routledge & Kegan Paul, London
24. Plass A, Koch U (2001) Participation of oncological outpatients in psychosocial support. *Psychooncology* 10 (6):511-520
25. Mikkelsen TH, Sondergaard J, Jensen AB, Olesen F (2008) Cancer rehabilitation: psychosocial rehabilitation needs after discharge from hospital? *Scand J Prim Health Care* 26 (4):216-221. doi:10.1080/02813430802295610

Figure 1: Enrollment of patients

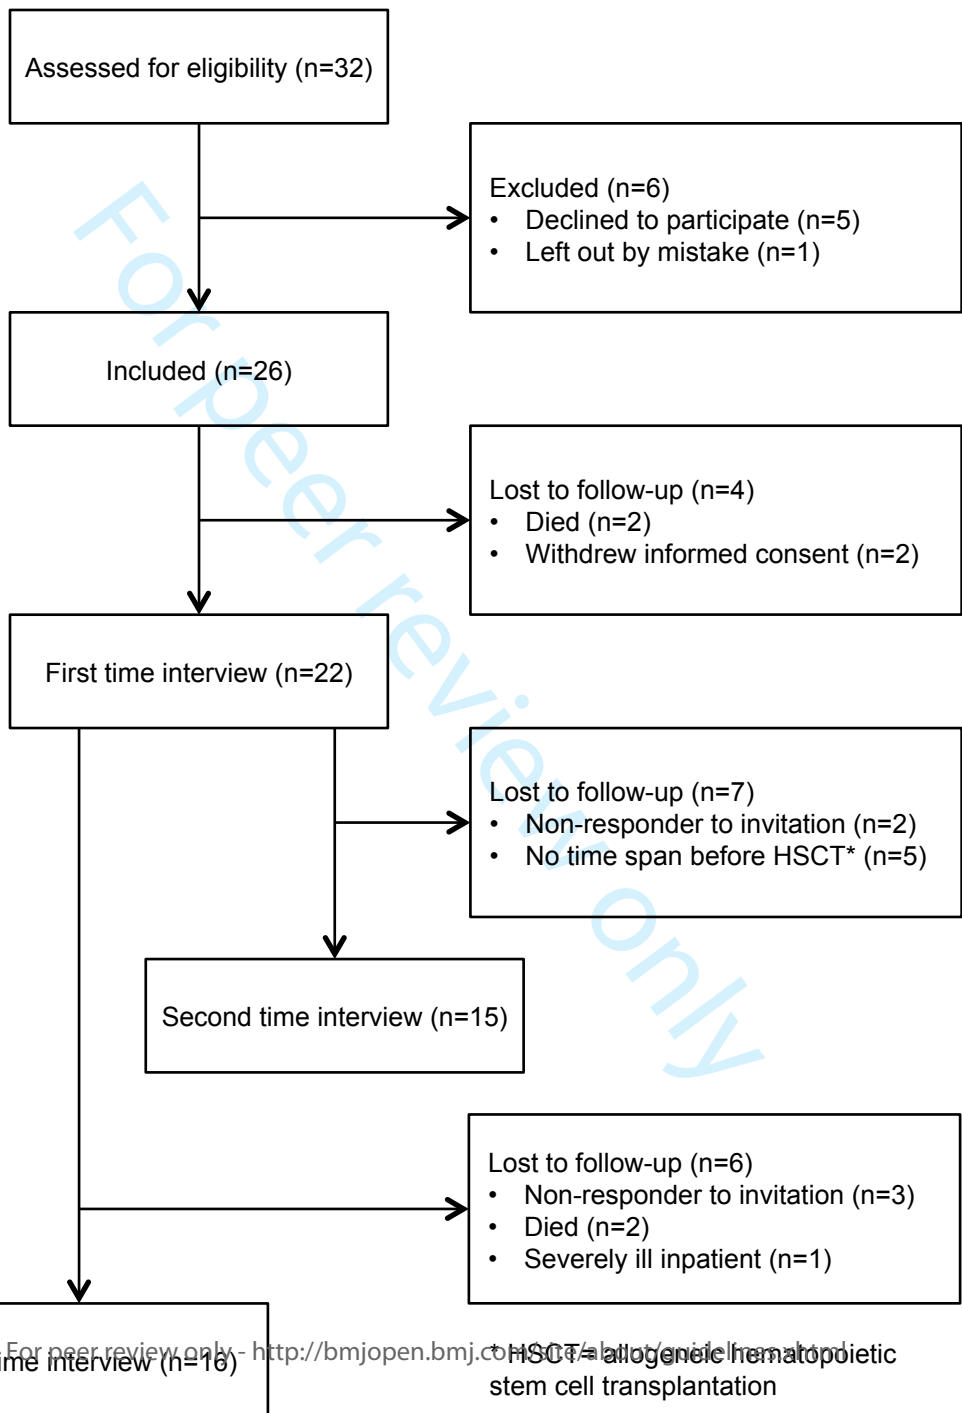

## Standards for Reporting Qualitative Research (SRQR)\*

<http://www.equator-network.org/reporting-guidelines/srqr/>

Page/line no(s).

### Title and abstract

|                                                                                                                                                                                                                                                              |   |
|--------------------------------------------------------------------------------------------------------------------------------------------------------------------------------------------------------------------------------------------------------------|---|
| <p><b>Title</b> - Concise description of the nature and topic of the study Identifying the study as qualitative or indicating the approach (e.g., ethnography, grounded theory) or data collection methods (e.g., interview, focus group) is recommended</p> | 1 |
| <p><b>Abstract</b> - Summary of key elements of the study using the abstract format of the intended publication; typically includes background, purpose, methods, results, and conclusions</p>                                                               | 2 |

### Introduction

|                                                                                                                                                                     |   |
|---------------------------------------------------------------------------------------------------------------------------------------------------------------------|---|
| <p><b>Problem formulation</b> - Description and significance of the problem/phenomenon studied; review of relevant theory and empirical work; problem statement</p> | 5 |
| <p><b>Purpose or research question</b> - Purpose of the study and specific objectives or questions</p>                                                              | 6 |

### Methods

|                                                                                                                                                                                                                                                                                                                                                                                                             |     |
|-------------------------------------------------------------------------------------------------------------------------------------------------------------------------------------------------------------------------------------------------------------------------------------------------------------------------------------------------------------------------------------------------------------|-----|
| <p><b>Qualitative approach and research paradigm</b> - Qualitative approach (e.g., ethnography, grounded theory, case study, phenomenology, narrative research) and guiding theory if appropriate; identifying the research paradigm (e.g., postpositivist, constructivist/ interpretivist) is also recommended; rationale**</p>                                                                            | 6   |
| <p><b>Researcher characteristics and reflexivity</b> - Researchers' characteristics that may influence the research, including personal attributes, qualifications/experience, relationship with participants, assumptions, and/or presuppositions; potential or actual interaction between researchers' characteristics and the research questions, approach, methods, results, and/or transferability</p> | 6   |
| <p><b>Context</b> - Setting/site and salient contextual factors; rationale**</p>                                                                                                                                                                                                                                                                                                                            | 8-9 |
| <p><b>Sampling strategy</b> - How and why research participants, documents, or events were selected; criteria for deciding when no further sampling was necessary (e.g., sampling saturation); rationale**</p>                                                                                                                                                                                              | 7   |
| <p><b>Ethical issues pertaining to human subjects</b> - Documentation of approval by an appropriate ethics review board and participant consent, or explanation for lack thereof; other confidentiality and data security issues</p>                                                                                                                                                                        | 10  |
| <p><b>Data collection methods</b> - Types of data collected; details of data collection procedures including (as appropriate) start and stop dates of data collection and analysis, iterative process, triangulation of sources/methods, and modification of procedures in response to evolving study findings; rationale**</p>                                                                             | 6   |



|    |                                                                                         |      |
|----|-----------------------------------------------------------------------------------------|------|
| 1  |                                                                                         |      |
| 2  |                                                                                         |      |
| 3  | <b>Data collection instruments and technologies</b> - Description of instruments (e.g., |      |
| 4  | interview guides, questionnaires) and devices (e.g., audio recorders) used for data     |      |
| 5  | collection; if/how the instrument(s) changed over the course of the study               | 6    |
| 6  |                                                                                         |      |
| 7  | <b>Units of study</b> - Number and relevant characteristics of participants, documents, |      |
| 8  | or events included in the study; level of participation (could be reported in results)  | 7-8  |
| 9  |                                                                                         |      |
| 10 | <b>Data processing</b> - Methods for processing data prior to and during analysis,      |      |
| 11 | including transcription, data entry, data management and security, verification of      |      |
| 12 | data integrity, data coding, and anonymization/de-identification of excerpts            | 9-10 |
| 13 |                                                                                         |      |
| 14 | <b>Data analysis</b> - Process by which inferences, themes, etc., were identified and   |      |
| 15 | developed, including the researchers involved in data analysis; usually references a    |      |
| 16 | specific paradigm or approach; rationale**                                              | 9-10 |
| 17 |                                                                                         |      |
| 18 | <b>Techniques to enhance trustworthiness</b> - Techniques to enhance trustworthiness    |      |
| 19 | and credibility of data analysis (e.g., member checking, audit trail, triangulation);   |      |
| 20 | rationale**                                                                             | 10   |

### Results/findings

|    |                                                                                             |       |
|----|---------------------------------------------------------------------------------------------|-------|
| 23 | <b>Synthesis and interpretation</b> - Main findings (e.g., interpretations, inferences, and |       |
| 24 | themes); might include development of a theory or model, or integration with                |       |
| 25 | prior research or theory                                                                    | 10-15 |
| 26 |                                                                                             |       |
| 27 | <b>Links to empirical data</b> - Evidence (e.g., quotes, field notes, text excerpts,        |       |
| 28 | photographs) to substantiate analytic findings                                              | 10-14 |
| 29 |                                                                                             |       |

### Discussion

|    |                                                                                           |       |
|----|-------------------------------------------------------------------------------------------|-------|
| 32 | <b>Integration with prior work, implications, transferability, and contribution(s) to</b> |       |
| 33 | <b>the field</b> - Short summary of main findings; explanation of how findings and        |       |
| 34 | conclusions connect to, support, elaborate on, or challenge conclusions of earlier        |       |
| 35 | scholarship; discussion of scope of application/generalizability; identification of       |       |
| 36 | unique contribution(s) to scholarship in a discipline or field                            | 15-17 |
| 37 |                                                                                           |       |
| 38 | <b>Limitations</b> - Trustworthiness and limitations of findings                          | 17    |
| 39 |                                                                                           |       |

### Other

|    |                                                                                            |   |
|----|--------------------------------------------------------------------------------------------|---|
| 42 | <b>Conflicts of interest</b> - Potential sources of influence or perceived influence on    |   |
| 43 | study conduct and conclusions; how these were managed                                      | 3 |
| 44 |                                                                                            |   |
| 45 | <b>Funding</b> - Sources of funding and other support; role of funders in data collection, |   |
| 46 | interpretation, and reporting                                                              | 3 |
| 47 |                                                                                            |   |

\*The authors created the SRQR by searching the literature to identify guidelines, reporting standards, and critical appraisal criteria for qualitative research; reviewing the reference lists of retrieved sources; and contacting experts to gain feedback. The SRQR aims to improve the transparency of all aspects of qualitative research by providing clear standards for reporting qualitative research.

1  
2  
3  
4  
5  
6  
7  
8  
9  
10  
11  
12  
13  
14  
15  
16  
17  
18  
19  
20  
21  
22  
23  
24  
25  
26  
27  
28  
29  
30  
31  
32  
33  
34  
35  
36  
37  
38  
39  
40  
41  
42  
43  
44  
45  
46  
47  
48  
49  
50  
51  
52  
53  
54  
55  
56  
57  
58  
59  
60

\*\*The rationale should briefly discuss the justification for choosing that theory, approach, method, or technique rather than other options available, the assumptions and limitations implicit in those choices, and how those choices influence study conclusions and transferability. As appropriate, the rationale for several items might be discussed together.

**Reference:**

O'Brien BC, Harris IB, Beckman TJ, Reed DA, Cook DA. **Standards for reporting qualitative research: a synthesis of recommendations.** *Academic Medicine*, Vol. 89, No. 9 / Sept 2014  
DOI: 10.1097/ACM.0000000000000388

For peer review only

# BMJ Open

## Rehabilitation during intensive treatment of acute leukemia including allogenic stem cell transplantation – a qualitative study of patient experiences

|                                 |                                                                                                                                                                                                                                                                                                                                                                                                                                                                                          |
|---------------------------------|------------------------------------------------------------------------------------------------------------------------------------------------------------------------------------------------------------------------------------------------------------------------------------------------------------------------------------------------------------------------------------------------------------------------------------------------------------------------------------------|
| Journal:                        | <i>BMJ Open</i>                                                                                                                                                                                                                                                                                                                                                                                                                                                                          |
| Manuscript ID                   | bmjopen-2019-029470.R2                                                                                                                                                                                                                                                                                                                                                                                                                                                                   |
| Article Type:                   | Original research                                                                                                                                                                                                                                                                                                                                                                                                                                                                        |
| Date Submitted by the Author:   | 22-Oct-2019                                                                                                                                                                                                                                                                                                                                                                                                                                                                              |
| Complete List of Authors:       | Jepsen, Lene Østergaard; Odense Universitetshospital, Friis, Lone Smidstrup; Rigshospitalet, Hematology<br>Hoybye, Mette Terp; Regionshospitalet Silkeborg, 3. Interdisciplinary Research Unit, Elective Surgery Center<br>Marcher, Claus Werenberg; Odense Universitetshospital, Hematology<br>Hansen, Dorte; University of Southern Denmark, National Research Centre for Cancer Rehabilitation, National Research Centre for Cancer Rehabilitation, Research Unit of General Practice |
| <b>Primary Subject Heading</b>: | Haematology (incl blood transfusion)                                                                                                                                                                                                                                                                                                                                                                                                                                                     |
| Secondary Subject Heading:      | Qualitative research                                                                                                                                                                                                                                                                                                                                                                                                                                                                     |
| Keywords:                       | Leukaemia < HAEMATOLOGY, REHABILITATION MEDICINE, Everyday life, QUALITATIVE RESEARCH                                                                                                                                                                                                                                                                                                                                                                                                    |
|                                 |                                                                                                                                                                                                                                                                                                                                                                                                                                                                                          |

SCHOLARONE™  
Manuscripts

## Manuscript 3

1  
2  
3  
4 Rehabilitation during intensive treatment of acute leukemia including allogenic stem cell  
5 transplantation – a qualitative study of patient experiences  
6

---

**Authors**

10 Lene Østergaard Jepsen, MD, PhD<sup>1</sup>

12 Lone Smidstrup Friis, MD, PhD<sup>2</sup>

14 Mette Terp Høybye, MSc, PhD<sup>3,4</sup>

16 Claus Werenberg Marcher, MD, PhD<sup>1</sup>

18 Dorte Gilså Hansen, Ass. Professor, MD, PhD<sup>5</sup>

**Affiliations**

1. Department of Hematology, Odense University Hospital, Denmark
2. Department of Hematology, National University Hospital, Copenhagen, Denmark
3. Interdisciplinary Research Unit, Elective Surgery Center, Silkeborg Regional Hospital, Denmark
4. Interacting Minds Center, Department of Clinical Medicine, Aarhus University, Denmark
5. Research Unit of General Practice, University of Southern Denmark

**Correspondence**

38 Lene Østergaard Jepsen, MD, PhD

40 Odense University Hospital

42 Department of Hematology

44 Sdr. Boulevard 29

46 DK-5000 Odense C

48 Denmark

50 Tel: +45 2892 1581

52 E-mail: lene.jepsen@rsyd.dk

1 Manuscript 3  
2  
3

4 **Abstract**

5  
6 **Objectives**

7  
8 The diagnosis and treatment of acute leukemia affect physical, psychosocial and existential functioning.

9  
10 Long-lasting treatment periods with impaired immune system, hygienic and social restrictions challenge  
11 patient well-being and rehabilitation as compared to other individuals with cancer. This study elucidates how  
12 acute leukemia patients, treated with curative intent in an outpatient setting, assess their physical,  
13 psychosocial and existential capability during and following treatment, and furthermore reports on the health  
14 initiatives offered to support their rehabilitation.  
15  
16  
17  
18  
19

20  
21  
22 **Design, setting, participants and interventions**

23  
24 We conducted qualitative, semi-structured individual interviews with 16 acute leukemia patients, six months  
25 after end of treatment in the patients' homes. This was the final interview, in a line of three, carried out as  
26 part of a larger qualitative study.  
27  
28  
29

30  
31 **Results**

32  
33 The data were analyzed thematically through an inductive ongoing process consisting of four steps. The final  
34 step, selective coding, resulted in the three categories: physical activity, mental well-being and social  
35 activity. None of the patients were satisfied with their physical capability at the time of interview and  
36 experienced substantial impairment of functional capabilities. All patients struggled with anxiety and  
37 expressed a need for continuous progress in treatment and well-being to feel safe. It took an unexpected large  
38 effort to regain a meaningful social life, and patients still had to prioritize activities.  
39  
40  
41  
42  
43  
44  
45

46  
47 **Conclusions**

48  
49 Acute leukemia patients suffered physically, psychologically and existentially throughout their illness  
50 trajectory. Rehabilitation initiatives deriving from the health care system and municipalities held room for  
51 improvement. Future programs should pay attention to the contextual changes of treatment of this patient  
52 group and individuals' changing needs and motivation of physical exercise.  
53  
54  
55  
56  
57  
58  
59  
60

Manuscript 3

## Summary

### Strength and limitations of the study

- A relatively small number of participants may challenge generalization to the wider population of individuals with hematological cancer
- The patients showed a high degree of self-preservation instinct during the illness trajectory, which may indicate a selection bias
- The theoretical framework of rehabilitation may strengthen the possibility of analytical generalization

### Funding

This work was supported by the University of Southern Denmark, DKK 400.000, the Region of Southern Denmark, DKK 500.000, The Danish Cancer Society, DKK 465.000, the Anders Hasselbalch Foundation, DKK 20.000, the Family Hede Nielsen Foundation, DKK 25.000 and the joint research pool between National University Hospital and Odense University Hospital supporting the highly-specialized functions, DKK 40.000. The National Research Center of Cancer Rehabilitation, University of Southern Denmark is partly funded by the Danish Cancer Society.

### Conflicts of interest

The authors declare that they have no conflicts of interest.

### Author contribution

LØJ participated in the design of the study, carried out the interviews, analyzed data and drafted the manuscript. LF participated in the design of the study and in the discussion of the analysis and the results. She also critically revised the manuscript. CM participated in the discussion of the analysis and the results. He also critically revised the manuscript. MH participated in the design of the study and in the discussion of the analysis and the results. She also critically revised the manuscript. DH participated in the design of the study and in the discussion of the analysis and the results. She also critically revised the manuscript. All authors read and approved the final manuscript.

1 Manuscript 3  
2  
3

4 **Patient consent form**

5 Written informed consent for publication of their transcribed interviews was obtained from the patients and  
6  
7 their spouses. A copy of the consent form is available for review by the Editor of this journal.  
8  
9

10  
11 **Data sharing**

12 The dataset generated and analyzed during the current study is not publicly available because it contains  
13 information that could compromise research participant privacy, but is available from the corresponding  
14  
15 author on reasonable request.  
16  
17  
18  
19

20  
21 **Keywords**

22  
23 Rehabilitation, acute leukemia, everyday life, qualitative study  
24  
25  
26  
27  
28  
29  
30  
31  
32  
33  
34  
35  
36  
37  
38  
39  
40  
41  
42  
43  
44  
45  
46  
47  
48  
49  
50  
51  
52  
53  
54  
55  
56  
57  
58  
59  
60

## Manuscript 3

**Introduction**

Patients with acute leukemia (AL) undergo extraordinary long periods of intensive treatment with high susceptibility to sudden and dramatic changes in their health condition and prognosis [1]. Impairment of the immune system necessitates substantial hygienic and social restrictions. However, during the last decade, a paradigm shift in the treatment of these severely immune insufficient patients has occurred. The patients who were formerly isolated at the hospital during their highly intensive treatment are now managed in the outpatient setting while concurrently living at home. Rehabilitation needs of the patients and rehabilitation offers by the health care system are challenged by these organizational changes. However, little clinical or research attention has been paid to rehabilitation and survivorship care for this specific group of immune insufficient individuals with hematological cancer managed in an outpatient setting.

In this paper, the concept of rehabilitation refers to specific initiatives and efforts by health professionals but is also an analytical concept for describing the process in which the patients reframe a sense of self [2].

The existing knowledge underlines beneficial effects of rehabilitation to individuals with cancer. From a few studies, we know that physical exercise is feasible and safe for AL inpatients, even those with critical cytopenia. Beneficial effects on physical performance, fatigue and quality of life have been shown [3-9]. As an example, supervised exercise and health counseling intervention for patients with AL during outpatient management showed physical, functional, psychosocial, and symptom benefits [8]. Patients undergoing allogenic hematopoietic stem cell transplantation (HSCT) due to hematological malignancies have also shown significant benefit from exercise interventions without reports of negative effects [9].

Health-related quality of life of individuals with hematological cancer is lowered mainly due to reduced role functioning, insomnia and fatigue [10,11]. Unmet needs of rehabilitation are strongly associated with impaired quality of life for individuals with cancer in general [12]. Psychological counseling, physical rehabilitation, sexual and financial support and practical help have been found to be important, but needs vary with age, sex and cancer diagnosis [13,14].



## Manuscript 3

1  
2  
3  
4 Summing up, the existing knowledge underlines the beneficial effects of rehabilitation to patients with AL.  
5  
6 However, the rapid changes of treatment setting, patient population and lack of knowledge of existing  
7  
8 evidence may leave patients with unmet needs and functional impairment. Knowledge about patients'  
9  
10 experiences and expectations from the very special context of outpatient management may have the potential  
11  
12 to improve well-being of an increasing and still older group of intensively treated patients.  
13  
14

15 Based on patient interviews this paper elucidates how patients with AL treated with curative aim assess their  
16  
17 physical, psychosocial and existential capability during and following treatment and health initiatives  
18  
19 supporting their rehabilitation.  
20  
21

**Material and methods****Design**

22  
23  
24  
25  
26  
27 The material derives from individual, semi-structured interviews with 16 patients, six months after end of  
28  
29 treatment. This type of interview was deemed suitable to access and explore patient experience in an open  
30  
31 manner to allow for patients to add their own perspectives to the interviewer's agenda. These interviews  
32  
33 were the third and final interview, conducted as part of a larger qualitative study with the overall aim of  
34  
35 exploring the outpatient setting as a context of intensive cancer treatment [15,16]. We combined participant  
36  
37 observation in the outpatient setting (OPS), individual patient interviews, and group or individual interviews  
38  
39 with their relatives. Patients were consecutively invited by and gave consent to the first author, LØJ, who  
40  
41 conducted the interviews. LØJ presented herself as a PhD student and young medical doctor with previous  
42  
43 experience in the department.  
44  
45

46  
47 Semi-structured interviews were conducted based on a thematic interview guide [15]. The first topic was  
48  
49 'impact on everyday life practices' where rehabilitation issues were addressed by questions such as 'Try to  
50  
51 describe your present physical capability and how you reached that level'. The question was repeated for  
52  
53 psychosocial and existential well-being. There was one main question to each topic, and depending on the  
54  
55 patient's answers, three to eighteen additional questions to cover the topic sufficiently. The second topic, 'the  
56  
57  
58  
59  
60

## Manuscript 3

home', explored daily life at home and the roles of the family, whereas the third topic 'hygiene' addressed the impact of intense hygiene requirements.

### Patient and Public involvement

Patients were not involved in the research design.

### Participants and interviews

Participants were Danish speaking patients with AL intensively treated with a curative aim. All were managed in the OPS, 'the Home Unit' at the Department of Hematology, Odense University Hospital (OUH) and subsequently followed in the outpatient clinic at OUH or at the National University Hospital, Copenhagen or at Aarhus University Hospital if allogeneically transplanted [15].

Twenty-six patients were included from May 2013 to August 2014, and out of this group, 16 took part in this third interview, six months after end of treatment (Figure 1). Table 1 shows the demographic and clinical characteristics.

| Table 1 Demographic and clinical characteristics of study participants (n=16) |                            |
|-------------------------------------------------------------------------------|----------------------------|
| Sample characteristics, third interview                                       | Description                |
| Gender                                                                        |                            |
| • Male                                                                        | 9 (56 %)                   |
| • Female                                                                      | 7 (44 %)                   |
| Age (years)                                                                   | Mean 55.1; range up to 75) |
| • < 60                                                                        | 8 (50 %)                   |
| • ≥ 60                                                                        | 8 (50 %)                   |
| Marital status                                                                |                            |
| • Married or common-law relationship                                          | 13 (81 %)                  |
| • Single/divorced                                                             | 3 (19 %)                   |
| Education                                                                     |                            |
| • Unskilled workers                                                           | 2 (12 %)                   |
| • Skilled workers                                                             | 10 (63 %)                  |

## Manuscript 3

|                                                                                                                                                                                                                                                                       |                        |
|-----------------------------------------------------------------------------------------------------------------------------------------------------------------------------------------------------------------------------------------------------------------------|------------------------|
| <ul style="list-style-type: none"> <li>• Further education</li> </ul>                                                                                                                                                                                                 | 4 (25 %)               |
| Diagnosis*                                                                                                                                                                                                                                                            |                        |
| <ul style="list-style-type: none"> <li>• Acute myeloid leukemia (AML)</li> </ul>                                                                                                                                                                                      | 11 (69 %) (3 relapse)  |
| <ul style="list-style-type: none"> <li>• Chronic myeloid leukemia in myeloid blast crisis (CML)</li> </ul>                                                                                                                                                            | 1 (6 %)                |
| <ul style="list-style-type: none"> <li>• Chronic myelomonocytic leukemia (CMML)</li> </ul>                                                                                                                                                                            | 1 (6 %)                |
| <ul style="list-style-type: none"> <li>• Refractory anemia with excess blasts (RAEB)</li> </ul>                                                                                                                                                                       | 1 (6 %)                |
| <ul style="list-style-type: none"> <li>• Acute lymphoblastic leukemia (ALL)</li> </ul>                                                                                                                                                                                | 2 (13 %)               |
| Time from diagnosis to third interview (weeks)                                                                                                                                                                                                                        | Mean 51.9; range 40-72 |
| Treatment status                                                                                                                                                                                                                                                      |                        |
| <ul style="list-style-type: none"> <li>• Outpatient Clinic follow-up, Odense University Hospital</li> </ul>                                                                                                                                                           | 3 (19 %)               |
| <ul style="list-style-type: none"> <li>• Allogenic hematopoietic stem cell transplantation, National University Hospital, Copenhagen or Aarhus University Hospital</li> </ul>                                                                                         | 10 (62 %)              |
| <ul style="list-style-type: none"> <li>• Second line therapy, Odense University Hospital</li> </ul>                                                                                                                                                                   | 3 (19 %)               |
| <p>The CML, CMML and RAEB special leukemia diagnoses, which are chronic diseases, but often turn into acute leukemia after a short time. Therefore, they received treatment equivalent to acute leukemia patients' regimens and were handled identically to them.</p> |                        |

The interviews were conducted in the patients' home and lasted from 40 to 115 minutes (mean 68 minutes).

With permission, all interviews were digitally recorded.

### Context for rehabilitation

Rehabilitation has previously been understood as a practice related to the post-treatment life of patients, but the facilities and practices of the hospital during in and outpatient management may be considered a context of rehabilitation of patients with AL. In addition, non-hospital settings may be part of the rehabilitation.

The course of treatment for newly diagnosed patients with AL who are candidates for curative intended chemotherapy contains both in and outpatient periods. The latter where the patients, during periods with severe hematological cytopenia, stay at home and appear at follow-up visits every second day [15].

## Manuscript 3

1  
2  
3  
4 The OPS was situated next to the hematological department, OUH, where all the patients could use the  
5  
6 fitness facilities located there. A physiotherapist was present twice a week to instruct the patients.  
7  
8

9 Before receiving the transplant, patients were instructed in some simple exercises by a physiotherapist.  
10  
11 Furthermore, all patients had an exercise-bike in their bed-room during periods of isolation at the hospital.  
12  
13

14 In addition to physical exercise, patients could, at any time, ask for a referral for individual advice by a  
15  
16 physiotherapist, a psychologist, a chaplain or a medical social worker at the department. Furthermore,  
17  
18 psychologists from The Danish Cancer Society were available to patients and relatives in facilities at the  
19  
20 hospital.  
21  
22

23 In Denmark, the overall responsibility of rehabilitation is located at the local municipality level (98  
24  
25 municipalities/5.6 million inhabitants). Due to different demographics, staff and geography of the  
26  
27 municipalities, patients meet different offers and knowledge about their disease [17].  
28  
29

### 30 **Theoretical framework and analysis**

31  
32 The study was based on the World Health Organization (WHO) definition of rehabilitation [18], but  
33  
34 simultaneously acknowledged that rehabilitation formed an analytical approach to the physical, psychosocial  
35  
36 and existential challenges facing the patients with AL, and was not a structural or organizational intervention  
37  
38 as such. This paper aims to study the configuration of rehabilitation needs as experienced by patients with  
39  
40 AL and to draw attention to possible contextual factors that should be taken into account in future programs.  
41  
42 To further support our analytical exploration, the theoretical framework included International Classification  
43  
44 of Functioning, Disability and Health (ICF) pointing out the dynamic interaction of health condition, body  
45  
46 function and structure, activity, participation, and personal as well as environmental factors [19].  
47  
48  
49

50 The data were analyzed thematically through an inductive ongoing process of four steps inspired by Miles  
51  
52 and Huberman [20]. Step 1: the interviews were transcribed by a secretary and read several times by LØJ to  
53  
54 gain an overall understanding of the material. Step 2: specific paragraphs were identified as the content and  
55  
56 context related to each other and the study aim. Step 3: descriptive codes were produced and assigned. Step  
57  
58  
59  
60

Manuscript 3

1  
2  
3  
4 4: through selective coding the text was condensed into categories. The group of authors discussed the  
5 contents and interpretation of data throughout the process.  
6  
7

### 8 9 **Ethics**

10 Informed consent was obtained from all individual study participants. The study was approved by The  
11 Regional Scientific Ethical Committees for Southern Denmark (S-20122000 86), the Danish Data Protection  
12 Agency (J. no. 2008-58-0035) and the Department of Hematology, OUH. The first author had no  
13 professional medical interaction with the participants during the study period. We carefully recognize that  
14 participation in research while undergoing treatment for a serious illness puts strain on patients.  
15  
16  
17  
18  
19  
20  
21  
22

### 23 **Results**

24 Patients did not use the word 'rehabilitation' about the process of regaining physical, mental and social  
25 functioning. Rehabilitation was therefore an analytical condensation of the AL patients' assessments of their  
26 capability and experiences of supportive initiatives. Subcategories of physical activity, mental well-being  
27 and social activity were constructed and will be described separately in the following, although strongly  
28 interrelated as conceptualized by WHO and in the ICF-model [19]. Existential reflections and challenges  
29 emerged during interviews.  
30  
31  
32  
33  
34  
35  
36  
37

38 Reorganization of the everyday life practices was a first step for many of the patients. This process began  
39 when being discharged from hospital the first time and continued after end of treatment. They described how  
40 they had lacked the energy to participate in a full day's program, and for example had escalated activities  
41 from twice a week to every second day and from one to five hours. Their pace was still slow through all  
42 activities, and a nap in the afternoon was often needed. They preferred projects without a deadline. Limited  
43 house-keeping tasks, such as cutting the grass or vacuuming the house which would have posed no problem  
44 prior to the onset of illness were now 'physically demanding'. This challenged them substantially and greatly  
45 impacted their daily lives and psychosocial well-being. They had expected this during treatment, but six  
46 months after end of treatment, the patients had expected to be 'back to normal'.  
47  
48  
49  
50  
51  
52  
53  
54  
55  
56  
57  
58  
59  
60

## Manuscript 3

**Physical activity**

Nearly all patients reported that they went for walks, but the intensity, the distance and how often varied between patients and times during the illness trajectory. Some patients with neuropathy in the feet could only walk brief distances, whereas others walked for 1½ hour. The simple exercises, including the use of elastic exercise bands, as instructed at OUH were used by many patients.

‘I’ve only made those exercises and I feel a little – guilty about it because they said, You should just [walk] half an hour round the neighborhood. [] I’m a little afraid to fall. The energy level is also crucial. But now for example to day I would be able to do it. I would be able to walk half an hour. But then tomorrow maybe I’m just as limp as a dishrag.’ (Patient 10)

Referral from the hospital to the municipality for rehabilitation services was not systematic. The service offered by the municipalities comprised group training with other types of patients, one hour twice a week for six to twelve weeks. All the participants of this study experienced being the only patient with AL/HSCT. By the end of the course of training many were told that they performed too well to continue in the group. The patients described a lack of enthusiasm and competences by the health care professionals in the municipalities.

After concluding chemotherapy, a handful of patients exercised more intensively in a fitness center; did bike rides of 50 kilometers, swims of 1000 meters or three to four kilometers of running. They wanted to regain their usual physical strength and fitness but also aimed to be prepared if the AL relapsed.

‘So I was active. [] But I also think I had constantly in my mind – if it – my leukemia comes back, I’ll fucking be in good shape, right.’ (Patient 18)

None of the patients were satisfied with their physical status six months after the end of treatment or with being less capable than expected. In hindsight they reflected that it had been too easy to ‘escape’ the physiotherapist during hospitalization. They did not remember having been encouraged to be physically active when referred to the OPS. In the first interviews [15] the patients described how they prioritized

## Manuscript 3

1  
2  
3  
4 socializing with fellow patients in the OPS to the detriment of physical training. Still, they did not participate  
5  
6 in organized training but were more active through all the unnoticed activities at home, such as doing the  
7  
8 laundry, the dishes or walking the stairs [15]. However, activities that were part of their everyday life were  
9  
10 not perceived by patients as exercise.

11  
12  
13 The outcome of training programs offered by the municipality was experienced by the patients as low, and  
14  
15 they often performed too well to continue the program. Being evaluated in this way seemed  
16  
17 counterproductive to their motivation to continue training and produced dissatisfaction with their own  
18  
19 physical capability at the time of the last interview. The lack of physical capability still prevented the  
20  
21 patients from engaging in everyday life activities as they used to and wanted to.

**Mental well-being**

22  
23  
24  
25  
26 The treatment and the physical capability strongly influenced the mental well-being of the patients. When  
27  
28 not feeling better or when physical symptoms caused uncertainty the patients felt challenged.

29  
30  
31 ‘But I think psychologically or mentally we are pretty strong. That’s not a problem. That I can  
32  
33 recognize clearly. The only time I got a knock, was when the one kidney stopped working.

34  
35 There I thought damn, what is brewing now.’ (Patient 19)

36  
37  
38 Anxiety was always present but seldom shown, patients reported. Small things like a spot on the skin  
39  
40 initiated a flow of thoughts: graft versus host disease – AL relapse – death. One way to avoid these thoughts  
41  
42 was to be occupied with practical tasks and another way was to talk to family members or friends. All  
43  
44 patients used these coping strategies to a varying extent, and furthermore they talked to fellow-patients, when  
45  
46 meeting in the OPS.

47  
48  
49 AL had challenged their invulnerability and sense of self, which was usually shaped by work or social  
50  
51 activities. Therefore, many patients raised the existential question: ‘Who am I – besides being a leukemia  
52  
53 patient?’

54  
55  
56  
57 ‘Principally you are a lot because of you training and the background you have and what you  
58  
59 do.’ (Patient 23)

## Manuscript 3

1  
2  
3  
4 Patients had perceived that being cured was the end of the illness trajectory. The stepwise prolongation  
5  
6 experienced by everyone was psychologically draining. Furthermore, it was hard never to be given a ‘cured-  
7  
8 date’. As an alternative some patients made their own goals for when to view themselves as cured.  
9

10  
11 ‘Your status gets chronic. I have actually not spotted exactly what you get, but I have certainly  
12  
13 been told that I do not get a fit-for-duty certificate. So I just had, in a different way, to define  
14  
15 to myself when I’m recovered. And I am when I run my next half marathon.’ (Patient 25)  
16  
17

18  
19 Few patients had consulted a psychologist during the illness trajectory. The majority experienced no need to,  
20  
21 especially not in the beginning when survival and physical issues had priority. Later, it was a barrier to seek  
22  
23 counseling knowing they would have to describe their illness trajectory once again.  
24  
25

26  
27 Mental well-being was influenced by flow in treatment and physical capability. Most patients addressed the  
28  
29 mental challenges by talking to family and friends, which was also reflected by the fact that few patients had  
30  
31 contacted a psychologist.  
32

**Social activity**

33  
34 As previously described the social life of patients suffered while being inpatients, while outpatient  
35  
36 management allowed for more time spent together with fellow patients. This type of community became an  
37  
38 important and highly valued part of their social life [15].  
39  
40

41  
42 The difference between friends and acquaintances became more apparent as time went by. Losing contact  
43  
44 with persons previously counted as friends was a mental strain. As the trajectory proceeded patients wanted  
45  
46 the conversation to turn away from illness and treatment on to everyday things and the future.  
47

48  
49 ‘When we get together with friends, then there is a lot of talk about my illness. And that’s fair  
50  
51 enough, so now let’s talk about it and then move on. I also need some input, from the outside.’  
52  
53 (Patient 25)  
54  
55  
56  
57  
58  
59  
60



## Manuscript 3

1  
2  
3  
4 The treatment precautions during periods with severe hematological neutropenia meant that patients only  
5 saw a few people at a time and that nearly all social activity took place at home or at the hospital. Returning  
6  
7  
8 to a more regular social life after end of treatment was overwhelming and unexpectedly demanding.  
9

10  
11 ‘I have also begun to go and watch a football match and stuff even though that it’s not my  
12  
13 interest at all. But it is to learn to get along in those large gatherings. That was enormously  
14  
15 difficult I think. All that noise I had to get used to. It is difficult when you have been just  
16  
17 inside the house without anything.’ (Patient 18)  
18  
19

20  
21 Six months after end of treatment the energy level of patients was still impaired. Patients thus had to choose  
22  
23 for themselves what to participate in, and social activities were in competition with practical tasks, physical  
24  
25 activity and work.  
26

27  
28 The patients described how it was unexpectedly demanding to regain a meaningful social life. None of the  
29  
30 patients experienced or expected that social life had the attention of professional intervention.  
31  
32

**Discussion**

33  
34  
35 Six months after the end of treatment patients with AL were dissatisfied with their physical, psychological  
36  
37 and social capability. The rehabilitation support during all phases of treatment including HSCT and the  
38  
39 following phase of recovery were experienced as non-existing, minimal or inadequate.  
40

41  
42 Our results from the interviews conducted during earlier treatment phases showed that maintaining everyday  
43  
44 life was highly prioritized by patients as well as spouses [15,16]. In line with that, patients reported that they  
45  
46 did not exercise as much as they wanted to. In contrast with the evidence, a long hematological tradition of  
47  
48 avoiding physical training during periods of cytopenia may still be in practice [8,21]. Patients did not recall  
49  
50 professionals’ attention to physical activity during the course of treatment. At the same time they describe  
51  
52 having refused the physiotherapist’s training offer and prioritized the social engagement while at the OPS  
53  
54 [15]. Less contact with healthcare professionals during outpatient management may be another important  
55  
56 barrier. Our third interview thereby adds that the patients’ attitude towards training changed substantially  
57  
58  
59  
60

## Manuscript 3

1  
2  
3  
4 from having no motivation to feeling highly motivated after end of treatment. According to the patients the  
5 municipalities did not offer training courses matching these needs – at that time. Some patients were  
6 informed that they were performing too well to participate. Perhaps because they did not suffer from any  
7 specific disability but were very generally weakened. The termination of the training course contrasted their  
8 own perception of lacking physical capabilities to participate in everyday activities. Individual needs  
9 assessment based on the ICF-model including ‘activity’ and ‘participation’ could assist future patients and  
10 responsible practitioners to better understand patients’ functional level and motivation [19].  
11  
12  
13  
14  
15  
16  
17  
18  
19

20 It is relevant to consider that there is a difference between the patients’ attitudes and concrete actions  
21 regarding physical training during treatment. In the late modern society, patients are expected to take  
22 individual responsibility for their own health and health behavior – such as physical exercise, healthy food  
23 and so on [22]. It may be experienced as stigmatizing to the patients not to satisfy such expectations. This  
24 could, as a context for blaming the health care system for a lack of attention, be moving the responsibility  
25 away from the self and to the system [22,23].  
26  
27  
28  
29  
30  
31  
32

33 In line with the dynamic of the ICF-model the treatment and the physical capability strongly influenced the  
34 mental well-being of the patients and vice versa [19]. Few patients called for easier access to psychologists  
35 but the majority found no need since they experienced support from family, friends and other health care  
36 professionals. This is in line with a questionnaire study among 132 mixed hematological and oncological  
37 patients [24]. Internationally, systematic needs assessment has been recommended as part of routine cancer  
38 care to uncover substantial needs for professional support that would otherwise not be addressed [18].  
39  
40  
41  
42  
43  
44  
45

46 However, none of the patients in our study have had such a consultation. Another explanation to the sparse  
47 demand for psychological support may be that the weakest patients declined to participate in the study, had  
48 left, or that demanding existential problems surface later.  
49  
50  
51  
52

53 The patients had to prioritize caring for themselves even though it sometimes caused emotional limbo, as  
54 described in a previous focus group interview study of mixed individuals with cancer [25]. Social  
55 reintegration unexpectedly required an effort, and they had to challenge themselves step-by-step. None  
56  
57  
58  
59  
60

Manuscript 3

1  
2  
3  
4 seemed to expect professional help and no one stated that they should have been warned of the social  
5  
6 challenges. This gives the impression that the patients made no connection between their social life and the  
7  
8 possibility of professional support, e.g. as part of rehabilitation in line with the definition [18] and ICF-model  
9  
10 [19].  
11  
12

### 13 **Strength and limitations**

14  
15 The study design with a relatively small number of participants limits generalization to the wider population  
16  
17 of individuals with hematological cancer. The majority of patients received a HSCT as the final treatment  
18  
19 entity, and we were not able to differentiate our analysis in this regard. The patients showed a high degree of  
20  
21 self-preservation instinct during the illness trajectory, which may indicate a selection bias. However, the  
22  
23 theoretical framework of rehabilitation may strengthen the possibility of analytical generalization. Using the  
24  
25 dynamic ICF-model as basis of the data analysis, the focus was on physical, psychological and social  
26  
27 functioning of the body, activity and participation together with health-related and environmental factors. In  
28  
29 a rehabilitation perspective of this specific group of individuals with cancer, six months after intensive  
30  
31 treatment seems a short time. Additional data after one year or longer may show other aspects and  
32  
33 perspectives on for example, late mental or existential problems that cause other needs for rehabilitation.  
34  
35  
36  
37  
38

### 39 **Perspectives**

40 This study has several implications for future patients. The patients wanted the rehabilitation process to  
41  
42 begin shortly after the start of treatment. This is in line with all rehabilitation recommendations [19,18] and  
43  
44 highlights the need for focus on maintaining instead of catching up lost capabilities.  
45  
46

47 The need for continuous motivation by health care professionals was underlined. Patients' understanding of  
48  
49 and focus on the importance of physical activity for future performance are important, especially on days  
50  
51 with exhausting symptoms or bad mood. Even minor everyday activities like the change of linen counter loss  
52  
53 of muscle and impaired physical capability [8]. Simple exercises could be introduced shortly after the start of  
54  
55 treatment and be supervised through treatment including the OPS. Perhaps it is possible to couple these with  
56  
57  
58  
59  
60

## Manuscript 3

1  
2  
3  
4 social engagement with fellow patients. This may support continuity and activities across different hospitals,  
5  
6 home and municipality initiatives improving well-being and quality of life among patients.  
7

8  
9 Psychological counseling may support some patients, but health care professionals should be aware of  
10  
11 patient barriers rising from the need to ‘tell their story’ once more.  
12

13  
14 A review of the evidence for the treatment-initiated precautions can lead to improved patients’ participation  
15  
16 in role functioning, family- and social life. Furthermore this study suggests timely preparation of patient and  
17  
18 family members for them to understand that regaining a normal social life after end of treatment will be  
19  
20 another demanding phase.  
21  
22

**Conclusion**

23  
24  
25  
26 In conclusion, the findings of this study contribute to our understanding of how outpatients with AL treated  
27  
28 with curative intension, including HSCT, experience rehabilitation up to six months after end of treatment.  
29

30  
31 None of the patients were satisfied with their physical capability six months after end of treatment. They  
32  
33 managed to be physically active through daily tasks and had not experienced being offered an exercise  
34  
35 program matching their needs at the end of treatment when their motivation for being physically active arose.  
36  
37 Psychologically the patients struggled with anxiety with regards to infections or relapse, and their perceived  
38  
39 needs for progress in the treatment and in everyday functioning to feel well. Talking to family and friends  
40  
41 was experienced as a good way of addressing psychological challenges. The precautions stipulated by the  
42  
43 hospitals restricted social life and it unexpectedly demanded an effort by the patients to regain a meaningful  
44  
45 social life.  
46  
47

48  
49 Room for improvement of rehabilitation initiatives, from both the health care system and the municipalities,  
50  
51 has been identified. Regular needs assessment should be used to understand changes in health and motivation  
52  
53 during the illness trajectory. Health care professionals should remember that six months after end of  
54  
55 treatment is too early to expect full recovery of many everyday basic skills. For the benefit of the patients,  
56  
57 information about the rehabilitation process can be given up front, but must be addressed continuously.  
58  
59  
60

Manuscript 3

Figure 1: Enrollment of patients

## Acknowledgements

The authors wish to thank all the patients who participated in the study for their valuable contributions during a difficult period of their lives. This study was funded by the University of Southern Denmark, the Region of Southern Denmark, The Danish Cancer Society, the Anders Hasselbalch Foundation, the Family Hede Nielsen Foundation and the joint research pool between National University Hospital and Odense University Hospital supporting the highly-specialized functions. The National Research Center of Cancer Rehabilitation, University of Southern Denmark is partly funded by the Danish Cancer Society.

## References

1. Walter RB, Taylor LR, Gardner KM, Dorcy KS, Vaughn JE, Estey EH (2013) Outpatient management following intensive induction or salvage chemotherapy for acute myeloid leukemia. *Clin Adv Hematol Oncol* 11 (9):571-577
2. Messenger SD (2010) Getting past the accident: explosive devices, limb loss, and refashioning a life in a military medical center. *Med Anthropol Q* 24 (3):281-303
3. Elter T, Stipanov M, Heuser E, von Bergwelt-Baildon M, Bloch W, Hallek M, Baumann F (2009) Is physical exercise possible in patients with critical cytopenia undergoing intensive chemotherapy for acute leukaemia or aggressive lymphoma? *Int J Hematol* 90 (2):199-204. doi:10.1007/s12185-009-0376-4
4. Dimeo F, Schwartz S, Fietz T, Wanjura T, Boning D, Thiel E (2003) Effects of endurance training on the physical performance of patients with hematological malignancies during chemotherapy. *Support Care Cancer* 11 (10):623-628. doi:10.1007/s00520-003-0512-2
5. Battaglini CL, Hackney AC, Garcia R, Groff D, Evans E, Shea T (2009) The effects of an exercise program in leukemia patients. *Integr Cancer Ther* 8 (2):130-138. doi:10.1177/1534735409334266
6. Alibhai SM, O'Neill S, Fisher-Schlombs K, Breunis H, Brandwein JM, Timilshina N, Tomlinson GA, Klepin HD, Culos-Reed SN (2012) A clinical trial of supervised exercise for adult inpatients with acute myeloid leukemia (AML) undergoing induction chemotherapy. *Leuk Res* 36 (10):1255-1261. doi:10.1016/j.leukres.2012.05.016
7. Alibhai SM, Durbano S, Breunis H, Brandwein JM, Timilshina N, Tomlinson GA, Oh PI, Culos-Reed SN (2015) A phase II exercise randomized controlled trial for patients with acute myeloid leukemia undergoing induction chemotherapy. *Leuk Res*. doi:10.1016/j.leukres.2015.08.012
8. Jarden M, Adamsen L, Kjeldsen L, Birgens H, Tolver A, Christensen JF, Stensen M, Sorensen VA, Moller T (2013) The emerging role of exercise and health counseling in patients with acute leukemia undergoing chemotherapy during outpatient management. *Leuk Res* 37 (2):155-161. doi:10.1016/j.leukres.2012.09.001
9. Wiskemann J, Huber G (2008) Physical exercise as adjuvant therapy for patients undergoing hematopoietic stem cell transplantation. *Bone Marrow Transplant* 41 (4):321-329. doi:10.1038/sj.bmt.1705917
10. Johnsen AT, Tholstrup D, Petersen MA, Pedersen L, Groenvold M (2009) Health related quality of life in a nationally representative sample of haematological patients. *Eur J Haematol* 83 (2):139-148. doi:10.1111/j.1600-0609.2009.01250.x
11. Hoybye MT, Dalton SO, Christensen J, Larsen LR, Kuhn KG, Jensen JN, Carlsen K, Johansen C (2008) Research in Danish cancer rehabilitation: social characteristics and late effects of cancer among participants in the FOCARE research project. *Acta Oncol* 47 (1):47-55. doi:10.1080/02841860701418846

## Manuscript 3

12. Hansen DG, Larsen PV, Holm LV, Rottmann N, Bergholdt SH, Sondergaard J (2013) Association between unmet needs and quality of life of cancer patients: a population-based study. *Acta Oncol* 52 (2):391-399. doi:10.3109/0284186x.2012.742204
13. Veloso AG, Sperling C, Holm LV, Nicolaisen A, Rottmann N, Thayssen S, Christensen RD, Lehmann Knudsen J, Hansen DG (2013) Unmet needs in cancer rehabilitation during the early cancer trajectory--a nationwide patient survey. *Acta Oncol* 52 (2):372-381. doi:10.3109/0284186x.2012.745648
14. Holm LV, Hansen DG, Johansen C, Vedsted P, Larsen PV, Kragstrup J, Sondergaard J (2012) Participation in cancer rehabilitation and unmet needs: a population-based cohort study. *Support Care Cancer* 20 (11):2913-2924. doi:10.1007/s00520-012-1420-0
15. Jepsen LO, Hoybye MT, Hansen DG, Marcher CW, Friis LS (2015) Outpatient management of intensively treated acute leukemia patients-the patients' perspective. *Support Care Cancer*. doi:10.1007/s00520-015-3012-2
16. Jepsen LØ, Friis LS, Hansen DG, Marcher CW, Høybye MT (2019) Living with outpatient management as spouse to intensively treated acute leukemia patients. *PLOS ONE* 14(5): e0216821. doi: 10.1371/journal.pone.0216821
17. Kristiansen M, Adamsen L, Brinkmann FK, Krasnik A, Hendriksen C (2015) Need for strengthened focus on cancer rehabilitation in Danish municipalities. *Dan Med J* 62 (4):A5045
18. World Health Organization - Rehabilitation (2015).
19. World Health Organization - International Classification of Functioning, Disability and Health (ICF) (2001).
20. Miles MB, Huberman AM, Saldaña J (2014) *Qualitative data analysis : a methods sourcebook*. 3 edn. Sage, Thousand Oaks, CA
21. Midtgaard J, Baadsgaard MT, Moller T, Rasmussen B, Quist M, Andersen C, Rorth M, Adamsen L (2009) Self-reported physical activity behaviour; exercise motivation and information among Danish adult cancer patients undergoing chemotherapy. *Eur J Oncol Nurs* 13 (2):116-121. doi:10.1016/j.ejon.2009.01.006
22. Lupton D (1997) Consumerism, reflexivity and the medical encounter. *Soc Sci Med* 45 (3):373-381
23. Parsons T (1970) *The social system*. Reprinted edn. Routledge & Kegan Paul, London
24. Plass A, Koch U (2001) Participation of oncological outpatients in psychosocial support. *Psychooncology* 10 (6):511-520
25. Mikkelsen TH, Sondergaard J, Jensen AB, Olesen F (2008) Cancer rehabilitation: psychosocial rehabilitation needs after discharge from hospital? *Scand J Prim Health Care* 26 (4):216-221. doi:10.1080/02813430802295610

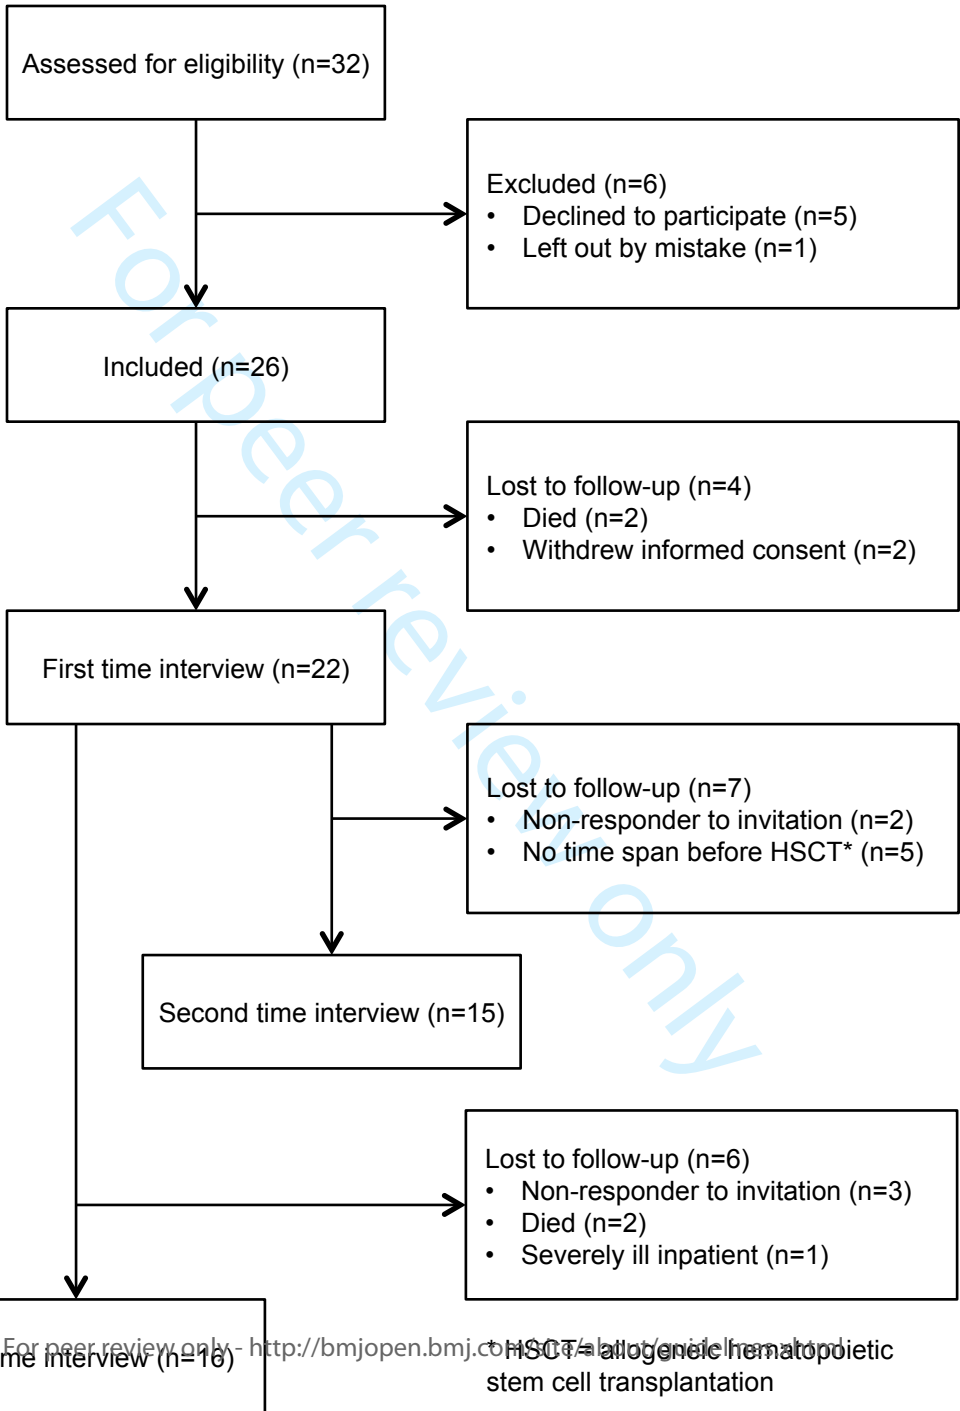

## Standards for Reporting Qualitative Research (SRQR)\*

<http://www.equator-network.org/reporting-guidelines/srqr/>

Page/line no(s).

### Title and abstract

|                                                                                                                                                                                                                                                              |   |
|--------------------------------------------------------------------------------------------------------------------------------------------------------------------------------------------------------------------------------------------------------------|---|
| <p><b>Title</b> - Concise description of the nature and topic of the study Identifying the study as qualitative or indicating the approach (e.g., ethnography, grounded theory) or data collection methods (e.g., interview, focus group) is recommended</p> | 1 |
| <p><b>Abstract</b> - Summary of key elements of the study using the abstract format of the intended publication; typically includes background, purpose, methods, results, and conclusions</p>                                                               | 2 |

### Introduction

|                                                                                                                                                                     |   |
|---------------------------------------------------------------------------------------------------------------------------------------------------------------------|---|
| <p><b>Problem formulation</b> - Description and significance of the problem/phenomenon studied; review of relevant theory and empirical work; problem statement</p> | 5 |
| <p><b>Purpose or research question</b> - Purpose of the study and specific objectives or questions</p>                                                              | 6 |

### Methods

|                                                                                                                                                                                                                                                                                                                                                                                                             |     |
|-------------------------------------------------------------------------------------------------------------------------------------------------------------------------------------------------------------------------------------------------------------------------------------------------------------------------------------------------------------------------------------------------------------|-----|
| <p><b>Qualitative approach and research paradigm</b> - Qualitative approach (e.g., ethnography, grounded theory, case study, phenomenology, narrative research) and guiding theory if appropriate; identifying the research paradigm (e.g., postpositivist, constructivist/ interpretivist) is also recommended; rationale**</p>                                                                            | 6   |
| <p><b>Researcher characteristics and reflexivity</b> - Researchers' characteristics that may influence the research, including personal attributes, qualifications/experience, relationship with participants, assumptions, and/or presuppositions; potential or actual interaction between researchers' characteristics and the research questions, approach, methods, results, and/or transferability</p> | 6   |
| <p><b>Context</b> - Setting/site and salient contextual factors; rationale**</p>                                                                                                                                                                                                                                                                                                                            | 8-9 |
| <p><b>Sampling strategy</b> - How and why research participants, documents, or events were selected; criteria for deciding when no further sampling was necessary (e.g., sampling saturation); rationale**</p>                                                                                                                                                                                              | 7   |
| <p><b>Ethical issues pertaining to human subjects</b> - Documentation of approval by an appropriate ethics review board and participant consent, or explanation for lack thereof; other confidentiality and data security issues</p>                                                                                                                                                                        | 10  |
| <p><b>Data collection methods</b> - Types of data collected; details of data collection procedures including (as appropriate) start and stop dates of data collection and analysis, iterative process, triangulation of sources/methods, and modification of procedures in response to evolving study findings; rationale**</p>                                                                             | 6   |



|                       |                                                                                                                                                                                                                                                       |      |
|-----------------------|-------------------------------------------------------------------------------------------------------------------------------------------------------------------------------------------------------------------------------------------------------|------|
| 1<br>2<br>3<br>4<br>5 | <b>Data collection instruments and technologies</b> - Description of instruments (e.g., interview guides, questionnaires) and devices (e.g., audio recorders) used for data collection; if/how the instrument(s) changed over the course of the study | 6    |
| 6<br>7<br>8           | <b>Units of study</b> - Number and relevant characteristics of participants, documents, or events included in the study; level of participation (could be reported in results)                                                                        | 7-8  |
| 9<br>10<br>11<br>12   | <b>Data processing</b> - Methods for processing data prior to and during analysis, including transcription, data entry, data management and security, verification of data integrity, data coding, and anonymization/de-identification of excerpts    | 9-10 |
| 13<br>14<br>15<br>16  | <b>Data analysis</b> - Process by which inferences, themes, etc., were identified and developed, including the researchers involved in data analysis; usually references a specific paradigm or approach; rationale**                                 | 9-10 |
| 17<br>18<br>19<br>20  | <b>Techniques to enhance trustworthiness</b> - Techniques to enhance trustworthiness and credibility of data analysis (e.g., member checking, audit trail, triangulation); rationale**                                                                | 10   |

### Results/findings

|                      |                                                                                                                                                                                                   |       |
|----------------------|---------------------------------------------------------------------------------------------------------------------------------------------------------------------------------------------------|-------|
| 23<br>24<br>25<br>26 | <b>Synthesis and interpretation</b> - Main findings (e.g., interpretations, inferences, and themes); might include development of a theory or model, or integration with prior research or theory | 10-15 |
| 27<br>28<br>29       | <b>Links to empirical data</b> - Evidence (e.g., quotes, field notes, text excerpts, photographs) to substantiate analytic findings                                                               | 10-14 |

### Discussion

|                                  |                                                                                                                                                                                                                                                                                                                                                                                                             |       |
|----------------------------------|-------------------------------------------------------------------------------------------------------------------------------------------------------------------------------------------------------------------------------------------------------------------------------------------------------------------------------------------------------------------------------------------------------------|-------|
| 32<br>33<br>34<br>35<br>36<br>37 | <b>Integration with prior work, implications, transferability, and contribution(s) to the field</b> - Short summary of main findings; explanation of how findings and conclusions connect to, support, elaborate on, or challenge conclusions of earlier scholarship; discussion of scope of application/generalizability; identification of unique contribution(s) to scholarship in a discipline or field | 15-17 |
| 38<br>39                         | <b>Limitations</b> - Trustworthiness and limitations of findings                                                                                                                                                                                                                                                                                                                                            | 17    |

### Other

|                |                                                                                                                                               |   |
|----------------|-----------------------------------------------------------------------------------------------------------------------------------------------|---|
| 42<br>43<br>44 | <b>Conflicts of interest</b> - Potential sources of influence or perceived influence on study conduct and conclusions; how these were managed | 3 |
| 45<br>46       | <b>Funding</b> - Sources of funding and other support; role of funders in data collection, interpretation, and reporting                      | 3 |

\*The authors created the SRQR by searching the literature to identify guidelines, reporting standards, and critical appraisal criteria for qualitative research; reviewing the reference lists of retrieved sources; and contacting experts to gain feedback. The SRQR aims to improve the transparency of all aspects of qualitative research by providing clear standards for reporting qualitative research.

1  
2  
3  
4  
5  
6  
7  
8  
9  
10  
11  
12  
13  
14  
15  
16  
17  
18  
19  
20  
21  
22  
23  
24  
25  
26  
27  
28  
29  
30  
31  
32  
33  
34  
35  
36  
37  
38  
39  
40  
41  
42  
43  
44  
45  
46  
47  
48  
49  
50  
51  
52  
53  
54  
55  
56  
57  
58  
59  
60

\*\*The rationale should briefly discuss the justification for choosing that theory, approach, method, or technique rather than other options available, the assumptions and limitations implicit in those choices, and how those choices influence study conclusions and transferability. As appropriate, the rationale for several items might be discussed together.

**Reference:**

O'Brien BC, Harris IB, Beckman TJ, Reed DA, Cook DA. **Standards for reporting qualitative research: a synthesis of recommendations.** *Academic Medicine*, Vol. 89, No. 9 / Sept 2014  
DOI: 10.1097/ACM.0000000000000388

For peer review only
